# Supplementary material
Source: ML conference proceedings conference paper supplement (https://openreview.net/forum?id=MQ2IvNeZJD)
Supplement: supplementary_material [file attachment]

---

|          | range of values<br>for feature 1 | range of values<br>for feature 2 | excluded combinations                           |
|----------|----------------------------------|----------------------------------|-------------------------------------------------|
| dsprites | 0-5                              | 0-2                              | (0,0),(5,2),(2,1),(3,1),(3,2)                   |
| 3dshapes | 0-7                              | 0-3                              | (0,0),(5,2),(2,1),(3,1),(3,2),(7,3),(0,3),(7,1) |
| mpi3d    | 0-5                              | 0-2                              | (0,0),(1,4),(0,5),(1,3),(1,1),(0,2)             |

---

Table 1: Specific combinations of features excluded for the NCFF task.

## 1 MIG EXAMPLE CALCULATION

Let  $g_1$  denote shape and  $g_2$  denote colour, and let  $H$  denote entropy and  $MI$  denote mutual information. We then calculate the MIG for the model in Table 1 as follows. First, note that

$$MI(z_1, g_1) = MI(z_1, g_2) = 0, \quad (1)$$

because  $z_1$  is just noise. Then, assuming balanced classes, we have  $H(g_1) = H(g_2) = 1$ . As  $g_1$  encodes each to an accuracy of 75%, the conditional entropy is

$$-0.75 \log(0.75) - (0.25) \log 0.25 = 0.8113,$$

and so

$$MI(z_2, g_1) = MI(z_2, g_2) = 1 - 0.8113 = 0.1887.$$

The MIG, which is identical for both features, is then

$$MI(z_2, g_1) - MI(z_1, g_1) = MI(z_2, g_2) - MI(z_1, g_2) = 0.1887 - 0 = 0.1887.$$

Now, we calculate MIG for the second described model. Here,

$$MI(z_2, g_1) = MI(z_2, g_2) = 0.1887,$$

as above, and also  $MI(z_1, g_2) = 0$  as above. Now, however,

$$MI(z_1, g_1) = 1 - (-0.7 \log(0.7) - (0.3) \log 0.3) = 1 - 0.8813 = 0.1187,$$

So, the MIG for  $g_2$  is the same as for the first model, but the MIG for  $g_1$  is

$$MI(z_2, g_1) - MI(z_1, g_1) = 0.1887 - 0.1187 = 0.07.$$

## 2 NCFF RESULTS WITH STANDARD DEVIATIONS

Tabel 2 shows the central tendency, i.e. mean and standard deviations, across all the different feature combinations we exclude. For the the ‘full’ results, which just excludes a random testset rather than specific feature value combinations, we report the mean and standard deviation of 5 independent runs. Each runs included a training from scratch of the VAE-model as well as training the various classifiers on top of it. The feature values excluded for given in Table 1.

## 3 FULL RESULTS

Here we show the full results for all the experiments reported in the main paper. Each of the following tables shows all results for a particular dataset and method combination. That is, each table shows results for single-neuron classification (SNC), neuron knockout (NK1 and NK2) and recognition of novel combinations of familiar features (NCFF) under the various settings described in the main paper.

For the NCFF settings, we indicate the values of two features excluded. Recall that we always exclude a combination of size and shape. So, for example “NCFF 3-2” means that the disentanglement model and the classifier trained on top of it, used a train set that excluded exactly those data points with size 3 and shape 2 (under some arbitrary ordering of the values of shape, e.g. 0=square, 1=circle, 2=crescent).

For all settings, we report the results for all features (where measured). The feature lists for each data set are as follows:

Table 2: NCFF results as a central tendency, mean and standard dev. (in parentheses) from each combination of feature values that was excluded. For the ‘full’ results, we show the mean and standard dev. of 5 independent runs.

|           |                | dsprites<br>size | shape       | both        | 3dshapes<br>size | shape       | both        | mpi3d<br>size | shape       | both        |
|-----------|----------------|------------------|-------------|-------------|------------------|-------------|-------------|---------------|-------------|-------------|
| bVAE      | normal testset | 99.0 (0.1)       | 99.6 (0.3)  | 98.7 (0.2)  | 99.4 (1.2)       | 100.0 (0.0) | 99.9 (0.2)  | 98.9 (0.1)    | 85.8 (1.9)  | 85.1 (1.9)  |
|           | NCFF           | 5.3 (4.0)        | 4.2 (9.2)   | 0.0 (3.7)   | 16.9 (23.2)      | 27.7 (30.3) | 0.0 (19.8)  | 72.8 (3.1)    | 5.2 (9.6)   | 4.3 (8.3)   |
|           | NCFF linear    | 2.5 (8.2)        | 91.6 (4.8)  | 2.0 (0.0)   | 36.0 (23.8)      | 70.6 (37.5) | 17.2 (0.0)  | 95.1 (17.5)   | 7.6 (10.4)  | 5.0 (10.5)  |
|           | NCFF excl 1    | 3.2 (3.0)        | 90.4 (13.9) | 2.0 (2.2)   | 32.7 (22.7)      | 71.6 (31.4) | 14.0 (16.3) | 88.5 (5.3)    | 9.1 (4.8)   | 7.0 (4.8)   |
|           | NCFF excl 2    | 4.2 (5.7)        | 94.9 (18.1) | 3.8 (3.0)   | 36.1 (22.1)      | 70.8 (27.4) | 17.4 (14.1) | 97.8 (12.4)   | 11.3 (8.6)  | 10.0 (8.4)  |
| btcVAE    | normal testset | 88.6 (0.2)       | 94.3 (0.6)  | 85.7 (0.3)  | 99.6 (0.5)       | 100.0 (0.1) | 99.6 (0.6)  | 97.6 (2.1)    | 81.2 (7.6)  | 79.9 (8.7)  |
|           | NCFF           | 0.2 (0.0)        | 38.0 (35.8) | 0.0 (0.0)   | 7.1 (32.0)       | 61.4 (20.1) | 3.9 (33.0)  | 83.0 (4.6)    | 3.6 (6.1)   | 3.4 (5.2)   |
|           | NCFF linear    | 0.0 (0.3)        | 99.8 (43.4) | 0.0 (0.0)   | 41.2 (15.7)      | 81.1 (36.0) | 28.9 (9.3)  | 98.0 (11.4)   | 11.3 (8.2)  | 10.6 (8.3)  |
|           | NCFF excl 1    | 0.0 (0.0)        | 92.5 (0.3)  | 0.0 (0.0)   | 28.7 (26.2)      | 79.8 (19.0) | 19.9 (25.5) | 92.1 (3.0)    | 13.0 (12.1) | 11.6 (10.8) |
|           | NCFF excl 2    | 0.0 (0.0)        | 82.9 (16.5) | 0.0 (0.0)   | 32.6 (25.5)      | 80.6 (16.0) | 20.3 (19.2) | 96.8 (5.0)    | 6.4 (10.0)  | 5.3 (9.0)   |
| factorVAE | normal testset | 97.5 (0.6)       | 98.4 (0.6)  | 96.4 (1.0)  | 92.6 (14.3)      | 98.8 (1.0)  | 91.5 (14.1) | 97.9 (0.4)    | 82.3 (1.7)  | 80.9 (1.9)  |
|           | NCFF           | 3.1 (13.3)       | 28.3 (28.4) | 0.3 (13.3)  | 13.5 (26.8)      | 36.9 (28.5) | 1.2 (16.5)  | 67.3 (2.4)    | 2.6 (10.8)  | 2.1 (9.9)   |
|           | NCFF linear    | 14.4 (4.6)       | 92.6 (24.8) | 12.2 (0.7)  | 40.8 (27.5)      | 62.1 (35.8) | 18.1 (3.2)  | 91.9 (17.4)   | 9.6 (4.0)   | 8.8 (3.5)   |
|           | NCFF excl 1    | 11.2 (20.3)      | 95.6 (8.7)  | 11.0 (17.2) | 36.1 (20.7)      | 60.3 (34.1) | 19.4 (21.9) | 87.7 (12.2)   | 9.6 (9.5)   | 8.6 (9.1)   |
|           | NCFF excl 2    | 8.5 (16.1)       | 70.6 (3.9)  | 6.4 (15.9)  | 28.8 (15.7)      | 67.8 (32.2) | 9.3 (22.1)  | 97.8 (9.0)    | 9.0 (8.9)   | 8.3 (7.9)   |
| pVAE      | normal testset | 77.0 (7.6)       | 97.4 (2.3)  | 75.9 (7.8)  | 96.7 (3.4)       | 99.0 (0.1)  | 95.8 (3.3)  | 80.6 (0.9)    | 35.2 (1.7)  | 29.1 (1.8)  |
|           | NCFF           | 3.6 (1.3)        | 25.6 (39.7) | 0.0 (1.0)   | 10.0 (32.1)      | 87.4 (9.1)  | 9.7 (31.9)  | 79.4 (8.3)    | 0.0 (0.4)   | 0.0 (0.3)   |
|           | NCFF linear    | 2.2 (6.8)        | 12.7 (41.9) | 0.3 (0.0)   | 14.2 (20.5)      | 95.3 (9.6)  | 4.5 (20.1)  | 87.8 (15.4)   | 0.0 (0.0)   | 0.0 (0.0)   |
|           | NCFF excl 1    | 3.1 (2.6)        | 28.3 (16.0) | 1.3 (0.5)   | 25.7 (34.2)      | 21.1 (7.4)  | 0.5 (11.1)  | 92.6 (10.6)   | 0.0 (0.0)   | 0.0 (0.0)   |
|           | NCFF excl 2    | 0.6 (2.9)        | 62.9 (24.5) | 0.4 (2.8)   | 22.2 (33.7)      | 95.2 (39.0) | 21.6 (0.7)  | 90.1 (3.8)    | 0.2 (0.0)   | 0.2 (0.0)   |
| MTD       | normal testset | 100.0 (0.2)      | 99.7 (0.0)  | 99.7 (0.2)  | 100.0 (0.0)      | 100.0 (0.0) | 100.0 (0.0) | 99.9 (0.1)    | 95.8 (0.0)  | 95.8 (0.6)  |
|           | NCFF           | 11.3 (7.5)       | 33.4 (5.5)  | 2.9 (1.6)   | 12.1 (4.1)       | 23.3 (1.9)  | 1.3 (0.7)   | 59.9 (18.4)   | 16.5 (21.5) | 5.0 (3.6)   |

- **dsprites:** x-position (x), y-position (y), object size (size), object orientation (orient), and object shape (shape)
- **3dshapes:** floor colour (floor h), wall colour (wall h), object size (size), camera azimuth (orient), object shape (shape), and object colour (object h)
- **mpi3d:** azimuth of robot arm (hor), altitude of robot arm (vert), size of object (size), colour of object (obj h), shape of object (shape), height of camera above the object (cam he), and background colour (bg h)

We also report the accuracy on both of the novel features, i.e. the fraction of the points for which the classifier correctly predicted both size and shape. This is shown in the ‘‘NCFF’’ column.

Table 3: Full results for BTCVAE on dsprites

|                  |             | x    | y    | size | orient | shape | NCFF |
|------------------|-------------|------|------|------|--------|-------|------|
| normal testset 0 | SNC         | 76.9 | 75.0 | 44.6 | 13.9   | 52.7  | 25.5 |
|                  | linear      | 47.6 | 49.2 | 54.8 | 11.8   | 84.6  | 48.7 |
|                  | NK1         | -    | -    | 99.0 | -      | 99.0  | -    |
|                  | NK2         | -    | -    | 98.9 | -      | 98.4  | 97.8 |
|                  | NCFF excl 1 | 30.4 | 35.2 | 79.9 | 28.7   | 99.0  | 98.5 |
|                  | NCFF excl 2 | -    | -    | -    | -      | -     | -    |
|                  | MLP         | 80.7 | 79.3 | 98.9 | 43.1   | 98.9  | 98.5 |
| normal testset 1 | SNC         | 75.5 | 74.7 | 44.6 | 3.1    | 52.4  | 19.9 |
|                  | SNC         | 75.5 | 74.7 | 44.4 | 12.0   | 52.4  | 22.2 |
|                  | linear      | 59.2 | 60.4 | 46.9 | 14.2   | 73.6  | 33.3 |
|                  | NK1         | -    | -    | 99.5 | -      | 99.9  | -    |
|                  | NK2         | -    | -    | 99.1 | -      | 99.8  | 80.7 |
|                  | NCFF excl 1 | 32.8 | 35.6 | 91.4 | 60.8   | 100.0 | -    |
|                  | NCFF excl 2 | 25.7 | 33.7 | 85.6 | 40.4   | 100.0 | -    |
| normal testset 2 | MLP         | 59.2 | 60.4 | 46.9 | 14.2   | 73.6  | 33.3 |
|                  | SNC         | 58.5 | 65.0 | 44.2 | 10.5   | 49.8  | 20.9 |
|                  | linear      | 73.1 | 55.3 | 44.7 | 10.7   | 65.1  | 31.5 |
|                  | NK1         | -    | -    | 95.6 | -      | 99.0  | 94.9 |
|                  | NK2         | -    | -    | 93.9 | -      | 99.1  | 93.1 |
|                  | NCFF excl 1 | 43.5 | 43.0 | 83.2 | 37.9   | 97.9  | -    |
|                  | NCFF excl 2 | 40.5 | 35.9 | 74.3 | 23.2   | 96.4  | -    |
| normal testset 3 | MLP         | 79.5 | 81.5 | 99.0 | 60.7   | 98.9  | 98.6 |
|                  | SNC         | 74.1 | 76.2 | 44.6 | 9.3    | 45.5  | 21.0 |
|                  | linear      | 60.0 | 51.7 | 45.2 | 8.4    | 68.8  | 31.0 |
|                  | NK1         | -    | -    | 99.0 | -      | 99.5  | 98.5 |
|                  | NK2         | -    | -    | 99.2 | -      | 99.0  | 98.2 |
|                  | NCFF excl 1 | 28.9 | 42.5 | 86.5 | 62.6   | 99.3  | -    |
|                  | NCFF excl 2 | 18.3 | 35.4 | 78.9 | 37.2   | 99.1  | -    |
| normal testset 4 | MLP         | 82.8 | 90.0 | 99.3 | 76.5   | 100.0 | 99.3 |
|                  | SNC         | 76.7 | 51.6 | 44.6 | 12.3   | 49.3  | 20.4 |
|                  | linear      | 81.5 | 87.1 | 99.0 | 72.9   | 100.0 | 99.0 |
|                  | NK1         | -    | -    | 98.9 | -      | 99.2  | 98.1 |
|                  | NK2         | -    | -    | 98.1 | -      | 98.8  | 96.9 |
|                  | NCFF excl 1 | 29.1 | 45.7 | 87.2 | 42.9   | 100.0 | -    |
|                  | NCFF excl 2 | 19.0 | 42.0 | 81.4 | 25.4   | 98.8  | -    |
| NCFF 0-0         | MLP         | 81.5 | 87.1 | 99.0 | 72.9   | 100.0 | 99.0 |
|                  | linear      | 32.0 | 38.6 | 0.6  | 3.0    | 0.0   | 0.0  |
|                  | NK1         | -    | -    | -    | -      | -     | -    |
|                  | NK2         | -    | -    | 0.0  | -      | 63.0  | 0.0  |
| NCFF 5-2         | mlp         | 91.2 | 96.7 | 0.0  | 6.4    | 19.0  | 0.0  |
|                  | linear      | 23.3 | 22.4 | 0.0  | 21.4   | 0.0   | 0.0  |
|                  | NK1         | -    | -    | 0.0  | -      | 99.7  | 0.0  |
|                  | NK2         | -    | -    | 0.0  | -      | 99.6  | 0.0  |
| NCFF 2-1         | mlp         | 22.1 | 19.8 | 0.0  | 40.2   | 95.5  | 0.0  |
|                  | linear      | 65.6 | 66.1 | 0.4  | 16.0   | 26.2  | 0.0  |
|                  | NK1         | -    | -    | 0.0  | -      | 100.0 | 0.0  |
|                  | NK2         | -    | -    | 0.0  | -      | 100.0 | 0.0  |
| NCFF 3-1         | mlp         | 97.7 | 95.5 | 0.0  | 78.8   | 100.0 | 0.0  |
|                  | linear      | 99.5 | 99.4 | 0.0  | 82.2   | 100.0 | 0.0  |
|                  | NK1         | -    | -    | 0.0  | -      | 100.0 | 0.0  |
|                  | NK2         | -    | -    | 0.0  | -      | 100.0 | 0.0  |
| NCFF 3-2         | mlp         | 99.5 | 99.4 | 0.0  | 82.2   | 100.0 | 0.0  |
|                  | linear      | 22.6 | 28.6 | 0.1  | 5.3    | 63.6  | 0.0  |
|                  | NK1         | -    | -    | 0.0  | -      | 99.4  | 0.0  |
|                  | NK2         | -    | -    | 0.0  | -      | 99.9  | 0.0  |
|                  | mlp         | 38.9 | 51.7 | 0.0  | 94.2   | 100.0 | 0.0  |

Table 4: Full results for BVAE on dsprites

|                  |             | x    | y    | size | orient | shape | NCFF |
|------------------|-------------|------|------|------|--------|-------|------|
| normal testset 0 | SNC         | 8.6  | 8.8  | 25.3 | 2.5    | 37.4  | 9.3  |
|                  | linear      | 70.1 | 72.1 | 48.0 | 7.2    | 44.3  | 17.6 |
|                  | NK1         | -    | -    | 99.0 | -      | 99.5  | 98.6 |
|                  | NK2         | -    | -    | 98.4 | -      | 99.0  | 97.6 |
|                  | NCFF excl 1 | 19.1 | 20.9 | 52.7 | 55.1   | 99.0  | -    |
|                  | NCFF excl 2 | 15.7 | 15.5 | 44.6 | 40.0   | 98.8  | -    |
|                  | MLP         | 89.6 | 92.9 | 99.0 | 65.5   | 99.6  | 98.8 |
| normal testset 1 | SNC         | 4.0  | 7.8  | 45.8 | 2.3    | 50.0  | 25.4 |
|                  | SNC         | 29.6 | 32.4 | 45.8 | 7.0    | 50.0  | 25.4 |
|                  | linear      | 57.7 | 62.4 | 50.3 | 9.1    | 46.8  | 20.1 |
|                  | NK1         | -    | -    | 99.0 | -      | 99.3  | 98.4 |
|                  | NK2         | -    | -    | 99.0 | -      | 99.3  | 98.3 |
|                  | NCFF excl 1 | 21.0 | 26.7 | 55.9 | 55.5   | 98.9  | -    |
|                  | NCFF excl 2 | 16.2 | 16.3 | 48.5 | 41.3   | 98.8  | -    |
|                  | MLP         | 91.2 | 92.5 | 99.2 | 66.8   | 99.5  | 98.9 |
| normal testset 2 | SNC         | 31.4 | 28.7 | 32.8 | 8.0    | 47.7  | 16.3 |
|                  | linear      | 61.5 | 62.3 | 42.5 | 7.3    | 41.2  | 16.4 |
|                  | NK1         | -    | -    | 99.1 | -      | 99.1  | 98.2 |
|                  | NK2         | -    | -    | 98.8 | -      | 98.9  | 97.7 |
|                  | NCFF excl 1 | 20.8 | 22.5 | 82.2 | 50.5   | 99.5  | -    |
|                  | NCFF excl 2 | 15.2 | 14.5 | 44.7 | 44.4   | 99.0  | -    |
|                  | MLP         | 90.4 | 91.4 | 98.9 | 65.7   | 99.8  | 98.8 |
| normal testset 3 | SNC         | 38.3 | 43.2 | 30.9 | 7.4    | 51.5  | 15.6 |
|                  | linear      | 68.1 | 71.4 | 44.9 | 8.0    | 53.6  | 25.0 |
|                  | NK1         | -    | -    | 99.0 | -      | 99.1  | 98.1 |
|                  | NK2         | -    | -    | 98.9 | -      | 98.8  | 97.8 |
|                  | NCFF excl 1 | 25.0 | 23.8 | 88.1 | 58.7   | 99.6  | -    |
|                  | NCFF excl 2 | 18.9 | 16.9 | 45.7 | 48.8   | 99.5  | -    |
|                  | MLP         | 94.1 | 94.2 | 98.9 | 67.5   | 99.9  | 98.8 |
| normal testset 4 | SNC         | 31.5 | 28.6 | 45.1 | 6.6    | 48.1  | 22.9 |
|                  | linear      | 59.7 | 57.2 | 50.3 | 6.1    | 53.6  | 20.6 |
|                  | NK1         | -    | -    | 99.0 | -      | 98.8  | 98.1 |
|                  | NK2         | -    | -    | 99.0 | -      | 99.3  | 98.4 |
|                  | NCFF excl 1 | 27.7 | 27.9 | 54.5 | 52.0   | 99.0  | -    |
|                  | NCFF excl 2 | 22.5 | 20.5 | 46.0 | 39.8   | 98.7  | -    |
|                  | MLP         | 89.9 | 89.4 | 99.0 | 61.7   | 99.1  | 98.4 |
| NCFF 0-0         | linear      | 30.1 | 19.4 | 7.9  | 2.6    | 0.0   | 0.0  |
|                  | NK1         | -    | -    | 7.4  | -      | 67.6  | 5.0  |
|                  | NK2         | -    | -    | 13.3 | -      | 58.0  | 7.2  |
|                  | mlp         | 95.8 | 94.0 | 7.0  | 10.8   | 78.5  | 5.1  |
| NCFF 5-2         | linear      | 21.1 | 21.4 | 18.5 | 8.4    | 8.9   | 0.0  |
|                  | NK1         | -    | -    | 0.1  | -      | 91.6  | 0.1  |
|                  | NK2         | -    | -    | 0.0  | -      | 97.7  | 0.0  |
|                  | mlp         | 44.4 | 51.2 | 0.0  | 76.8   | 96.9  | 0.0  |
| NCFF 2-1         | linear      | 3.1  | 3.1  | 0.0  | 2.5    | 0.0   | 0.0  |
|                  | NK1         | -    | -    | 1.8  | -      | 99.3  | 1.7  |
|                  | NK2         | -    | -    | 1.2  | -      | 96.7  | 1.3  |
|                  | mlp         | 89.1 | 87.8 | 5.6  | 38.7   | 99.7  | 5.5  |
| NCFF 3-1         | linear      | 86.1 | 30.0 | 0.0  | 9.9    | 2.2   | 0.0  |
|                  | NK1         | -    | -    | 3.3  | -      | 99.9  | 3.3  |
|                  | NK2         | -    | -    | 1.6  | -      | 99.7  | 1.6  |
|                  | mlp         | 98.4 | 97.9 | 8.4  | 73.5   | 99.9  | 8.4  |
| NCFF 3-2         | linear      | 22.5 | 20.4 | 0.0  | 9.4    | 9.7   | 0.0  |
|                  | NK1         | -    | -    | 0.0  | -      | 99.7  | 0.0  |
|                  | NK2         | -    | -    | 0.0  | -      | 99.6  | 0.0  |
|                  | mlp         | 79.6 | 84.3 | 0.0  | 92.2   | 99.4  | 0.0  |

Table 5: Full results for FACTOR on dsprites

|                  |             | x    | y    | size | orient | shape | NCFF |
|------------------|-------------|------|------|------|--------|-------|------|
| normal testset 0 | SNC         | 10.9 | 17.0 | 45.1 | 4.6    | 43.7  | 18.9 |
|                  | linear      | 31.4 | 29.8 | 49.1 | 4.7    | 46.3  | 20.5 |
|                  | NK1         | -    | -    | 96.9 | -      | 95.8  | 93.1 |
|                  | NK2         | -    | -    | 96.5 | -      | 95.6  | 92.3 |
|                  | NCFF excl 1 | 46.6 | 26.2 | 36.5 | 22.7   | 96.8  | -    |
|                  | NCFF excl 2 | 23.0 | 17.2 | 31.6 | 17.5   | 94.7  | -    |
|                  | MLP         | 76.3 | 77.7 | 97.4 | 34.0   | 98.6  | 96.3 |
| normal testset 1 | SNC         | 3.6  | 6.6  | 46.3 | 2.6    | 46.7  | 24.4 |
|                  | SNC         | 10.7 | 7.8  | 46.4 | 4.0    | 46.7  | 22.2 |
|                  | linear      | 20.3 | 21.7 | 49.8 | 3.9    | 43.9  | 22.9 |
|                  | NK1         | -    | -    | 95.4 | -      | 95.9  | -    |
|                  | NK2         | -    | -    | 95.3 | -      | 95.0  | 91.0 |
|                  | NCFF excl 1 | 26.3 | 45.8 | 37.6 | 22.1   | 96.6  | -    |
|                  | NCFF excl 2 | 19.6 | 33.3 | 31.2 | 15.9   | 94.6  | -    |
| normal testset 2 | MLP         | 75.0 | 74.9 | 97.0 | 32.4   | 97.5  | 95.2 |
|                  | SNC         | 10.3 | 5.9  | 33.1 | 8.0    | 54.0  | 16.7 |
|                  | linear      | 5.5  | 27.5 | 49.8 | 6.3    | 53.4  | 27.5 |
|                  | NK1         | -    | -    | 96.5 | -      | 98.8  | 95.5 |
|                  | NK2         | -    | -    | 95.5 | -      | 98.5  | 94.2 |
|                  | NCFF excl 1 | 48.7 | 46.9 | 43.1 | 27.6   | 97.5  | -    |
|                  | NCFF excl 2 | 26.7 | 20.8 | 37.3 | 18.9   | 96.3  | -    |
| normal testset 3 | MLP         | 78.2 | 78.7 | 98.4 | 42.2   | 99.0  | 97.7 |
|                  | SNC         | 13.4 | 48.4 | 43.5 | 4.6    | 38.6  | 17.4 |
|                  | linear      | 31.4 | 32.3 | 52.7 | 4.0    | 46.5  | 24.2 |
|                  | NK1         | -    | -    | 97.5 | -      | 97.7  | 95.6 |
|                  | NK2         | -    | -    | 96.7 | -      | 97.0  | 93.6 |
|                  | NCFF excl 1 | 29.4 | 23.4 | 37.1 | 22.7   | 98.0  | -    |
|                  | NCFF excl 2 | 20.1 | 16.2 | 33.6 | 14.2   | 94.8  | -    |
| normal testset 4 | MLP         | 76.1 | 77.8 | 97.9 | 36.4   | 98.6  | 96.8 |
|                  | SNC         | 42.8 | 15.9 | 31.9 | 8.2    | 46.8  | 15.4 |
|                  | linear      | 29.7 | 26.0 | 51.4 | 4.3    | 48.4  | 27.4 |
|                  | NK1         | -    | -    | 94.8 | -      | 97.5  | 92.6 |
|                  | NK2         | -    | -    | 94.9 | -      | 96.6  | -    |
|                  | NCFF excl 1 | 49.3 | 51.1 | 41.5 | 27.9   | 95.1  | -    |
|                  | NCFF excl 2 | 33.9 | 24.0 | 32.5 | 21.5   | 94.6  | -    |
| NCFF 0-0         | MLP         | 74.0 | 75.4 | 97.0 | 37.7   | 98.6  | 96.0 |
|                  | linear      | 37.3 | 29.6 | 2.1  | 2.9    | 0.0   | 0.0  |
|                  | NK1         | -    | -    | -    | -      | -     | -    |
|                  | NK2         | -    | -    | 0.0  | -      | 92.5  | 0.0  |
| NCFF 5-2         | mlp         | 96.6 | 95.5 | 0.4  | 7.5    | 31.5  | 0.0  |
|                  | linear      | 33.8 | 35.8 | 0.0  | 7.2    | 6.3   | 0.0  |
|                  | NK1         | -    | -    | -    | -      | -     | -    |
|                  | NK2         | -    | -    | 0.0  | -      | 97.0  | 0.0  |
| NCFF 2-1         | mlp         | 34.7 | 20.9 | 0.2  | 46.8   | 67.8  | 0.2  |
|                  | linear      | 27.0 | 27.8 | 11.2 | 7.2    | 57.4  | 1.6  |
|                  | NK1         | -    | -    | -    | -      | -     | -    |
|                  | NK2         | -    | -    | 34.8 | -      | 99.7  | 34.7 |
| NCFF 3-1         | mlp         | 27.0 | 27.8 | 11.2 | 7.2    | 57.4  | 1.6  |
|                  | linear      | 24.7 | 17.1 | 2.3  | 4.8    | 31.8  | 0.0  |
|                  | NK1         | -    | -    | 28.8 | -      | 86.5  | 24.4 |
|                  | NK2         | -    | -    | 21.3 | -      | 90.6  | 20.3 |
| NCFF 3-2         | mlp         | 89.3 | 85.2 | 30.6 | 28.8   | 98.8  | 30.1 |
|                  | linear      | 23.1 | 17.1 | 0.0  | 6.2    | 46.2  | 0.0  |
|                  | NK1         | -    | -    | 0.0  | -      | 98.7  | 0.0  |
|                  | NK2         | -    | -    | 0.0  | -      | 98.1  | 0.0  |
|                  | mlp         | 41.8 | 39.6 | 0.0  | 64.7   | 97.5  | 0.0  |

Table 6: Full results for MTD on dsprites

|                  |             | x    | y    | size  | orient | shape | zs    |
|------------------|-------------|------|------|-------|--------|-------|-------|
| normal testset 0 | SNC         | -    | -    | -     | -      | -     | -     |
|                  | linear      | -    | -    | -     | -      | -     | -     |
|                  | NK1         | -    | -    | -     | -      | -     | -     |
|                  | NK2         | -    | -    | -     | -      | -     | -     |
|                  | NCFF excl 1 | -    | -    | -     | -      | -     | -     |
|                  | NCFF excl 2 | -    | -    | -     | -      | -     | -     |
|                  | MLP         | 99.0 | 99.4 | 100.0 | 83.3   | 100.0 | 100.0 |
| normal testset 1 | SNC         | -    | -    | -     | -      | -     | -     |
|                  | SNC         | -    | -    | -     | -      | -     | -     |
|                  | linear      | -    | -    | -     | -      | -     | -     |
|                  | NK1         | -    | -    | -     | -      | -     | -     |
|                  | NK2         | -    | -    | -     | -      | -     | -     |
|                  | NCFF excl 1 | -    | -    | -     | -      | -     | -     |
|                  | NCFF excl 2 | -    | -    | -     | -      | -     | -     |
| normal testset 2 | MLP         | 99.0 | 98.6 | 99.8  | 75.0   | 100.0 | 99.8  |
|                  | SNC         | -    | -    | -     | -      | -     | -     |
|                  | linear      | -    | -    | -     | -      | -     | -     |
|                  | NK1         | -    | -    | -     | -      | -     | -     |
|                  | NK2         | -    | -    | -     | -      | -     | -     |
|                  | NCFF excl 1 | -    | -    | -     | -      | -     | -     |
|                  | NCFF excl 2 | -    | -    | -     | -      | -     | -     |
| normal testset 3 | MLP         | 98.3 | 98.6 | 99.8  | 75.4   | 100.0 | 99.8  |
|                  | SNC         | -    | -    | -     | -      | -     | -     |
|                  | linear      | -    | -    | -     | -      | -     | -     |
|                  | NK1         | -    | -    | -     | -      | -     | -     |
|                  | NK2         | -    | -    | -     | -      | -     | -     |
|                  | NCFF excl 1 | -    | -    | -     | -      | -     | -     |
|                  | NCFF excl 2 | -    | -    | -     | -      | -     | -     |
| normal testset 4 | MLP         | 97.2 | 98.8 | 99.4  | 74.1   | 100.0 | 99.4  |
|                  | SNC         | -    | -    | -     | -      | -     | -     |
|                  | linear      | -    | -    | -     | -      | -     | -     |
|                  | NK1         | -    | -    | -     | -      | -     | -     |
|                  | NK2         | -    | -    | -     | -      | -     | -     |
|                  | NCFF excl 1 | -    | -    | -     | -      | -     | -     |
|                  | NCFF excl 2 | -    | -    | -     | -      | -     | -     |
| NCFF 0-0         | MLP         | 98.7 | 97.4 | 99.6  | 73.0   | 100.0 | 99.6  |
|                  | linear      | -    | -    | -     | -      | -     | -     |
|                  | NK1         | -    | -    | -     | -      | -     | -     |
|                  | NK2         | 99.1 | 96.2 | 4.2   | 2.9    | 21.4  | 0.8   |
| NCFF 5-2         | mlp         | -    | -    | -     | -      | -     | -     |
|                  | linear      | -    | -    | -     | -      | -     | -     |
|                  | NK1         | -    | -    | -     | -      | -     | -     |
|                  | NK2         | -    | -    | -     | -      | -     | -     |
| NCFF 2-1         | mlp         | 77.9 | 77.6 | 6.1   | 3.3    | 33.9  | 2.5   |
|                  | linear      | -    | -    | -     | -      | -     | -     |
|                  | NK1         | -    | -    | -     | -      | -     | -     |
|                  | NK2         | -    | -    | -     | -      | -     | -     |
| NCFF 3-1         | mlp         | 94.1 | 95.8 | 17.8  | 3.1    | 25.6  | 3.8   |
|                  | linear      | -    | -    | -     | -      | -     | -     |
|                  | NK1         | -    | -    | -     | -      | -     | -     |
|                  | NK2         | -    | -    | -     | -      | -     | -     |
| NCFF 3-2         | mlp         | 93.9 | 95.8 | 17.8  | 3.6    | 35.6  | 4.5   |
|                  | linear      | -    | -    | -     | -      | -     | -     |
|                  | NK1         | -    | -    | -     | -      | -     | -     |
|                  | NK2         | -    | -    | -     | -      | -     | -     |
| NCFF 3-2         | mlp         | 88.2 | 88.8 | 3.6   | 3.1    | 38.3  | 0.9   |
|                  | linear      | -    | -    | -     | -      | -     | -     |

Table 7: Full results for PVAE on dsprites

|                  |             | x    | y    | size | orient | shape | NCFF |
|------------------|-------------|------|------|------|--------|-------|------|
| normal testset 0 | SNC         | 47.1 | 12.4 | 27.6 | 9.1    | 43.6  | 14.0 |
|                  | linear      | 42.2 | 48.9 | 42.9 | 8.6    | 52.1  | 22.9 |
|                  | NK1         | 74.5 | 38.0 | 73.2 | 36.5   | 46.2  | 33.8 |
|                  | NK2         | 37.3 | 74.1 | 71.0 | 32.3   | 45.0  | 31.4 |
|                  | NCFF excl 1 | 9.5  | 64.1 | 55.3 | 10.8   | 86.3  | -    |
|                  | NCFF excl 2 | 8.0  | 52.9 | 51.4 | 7.5    | -     | -    |
|                  | MLP         | 72.1 | 68.9 | 75.6 | 32.0   | 95.9  | 74.0 |
| normal testset 1 | SNC         | 6.3  | 3.8  | 17.1 | 3.0    | 44.3  | 7.2  |
|                  | SNC         | 7.5  | 6.5  | 30.7 | 8.2    | 44.4  | 13.5 |
|                  | linear      | 36.2 | 36.7 | 33.7 | 11.7   | 44.3  | 15.5 |
|                  | NK1         | 30.5 | 30.5 | 62.9 | 52.9   | 44.3  | 25.5 |
|                  | NK2         | 30.8 | 30.7 | 61.8 | 53.1   | 44.4  | 24.5 |
|                  | NCFF excl 1 | 15.7 | 27.3 | 71.1 | 15.5   | 90.2  | -    |
|                  | NCFF excl 2 | 12.8 | 22.2 | 62.0 | 6.8    | -     | -    |
| normal testset 2 | MLP         | 72.3 | 73.5 | 67.2 | 46.1   | 99.0  | 66.8 |
|                  | SNC         | 10.3 | 5.9  | 33.1 | 8.0    | 54.0  | 16.7 |
|                  | linear      | 30.8 | 31.6 | 39.8 | 11.1   | 60.0  | 24.0 |
|                  | NK1         | 42.0 | 38.3 | 63.5 | 57.7   | 50.4  | 31.8 |
|                  | NK2         | 39.3 | 68.9 | 82.7 | 18.9   | 46.6  | 39.2 |
|                  | NCFF excl 1 | 10.1 | 71.4 | 72.3 | 21.2   | 93.4  | -    |
|                  | NCFF excl 2 | 8.8  | 53.3 | 72.9 | 6.1    | -     | -    |
| normal testset 3 | MLP         | 70.3 | 74.2 | 78.9 | 55.0   | 99.0  | 78.5 |
|                  | SNC         | 13.4 | 48.4 | 43.5 | 4.6    | 38.6  | 17.4 |
|                  | linear      | 52.7 | 41.8 | 42.5 | 4.3    | 46.0  | 17.4 |
|                  | NK1         | 39.1 | 68.9 | 82.9 | 18.9   | 48.1  | 41.2 |
|                  | NK2         | 42.1 | 38.7 | 63.8 | 57.8   | 50.6  | 31.3 |
|                  | NCFF excl 1 | 65.5 | 7.6  | 50.5 | 11.3   | 83.1  | -    |
|                  | NCFF excl 2 | 59.1 | 5.9  | 44.6 | 7.9    | -     | -    |
| normal testset 4 | MLP         | 66.6 | 75.1 | 74.9 | 20.9   | 94.1  | 72.8 |
|                  | SNC         | 42.8 | 15.9 | 31.9 | 8.2    | 46.8  | 15.4 |
|                  | linear      | 37.5 | 46.1 | 46.3 | 11.7   | 45.5  | 20.3 |
|                  | NK1         | 62.1 | 49.8 | 55.8 | 52.1   | 51.9  | 28.7 |
|                  | NK2         | 37.3 | 74.1 | 71.0 | 32.3   | 45.0  | 31.4 |
|                  | NCFF excl 1 | 11.2 | 38.3 | 72.7 | 15.2   | 92.5  | -    |
|                  | NCFF excl 2 | 7.4  | 32.2 | 57.7 | 4.9    | -     | -    |
| NCFF 0-0         | MLP         | 70.3 | 73.5 | 88.2 | 50.1   | 99.0  | 87.7 |
|                  | linear      | 8.8  | 25.8 | 15.8 | 2.5    | 2.5   | 0.0  |
|                  | NK1         | 94.3 | 91.9 | 1.6  | 2.5    | 0.6   | 0.0  |
|                  | NK2         | 87.0 | 59.7 | 2.7  | 0.3    | 32.4  | 0.0  |
| NCFF 5-2         | mlp         | 99.4 | 99.1 | 0.0  | 2.5    | 0.0   | 0.0  |
|                  | linear      | 19.8 | 21.5 | 0.2  | 16.1   | 1.3   | 0.0  |
|                  | NK1         | 17.4 | 9.5  | 6.1  | 28.9   | 14.4  | 1.1  |
|                  | NK2         | 17.3 | 8.9  | 7.7  | 27.9   | 68.7  | 6.4  |
| NCFF 2-1         | mlp         | 16.8 | 20.5 | 0.2  | 36.6   | 60.7  | 0.0  |
|                  | linear      | 50.6 | 49.6 | 0.0  | 26.7   | 98.7  | 0.0  |
|                  | NK1         | 89.7 | 89.6 | 0.0  | 81.8   | 0.1   | 0.0  |
|                  | NK2         | 57.6 | 62.7 | 1.5  | 35.1   | 7.5   | 0.0  |
| NCFF 3-1         | mlp         | 93.1 | 90.4 | 0.0  | 74.2   | 95.7  | 0.0  |
|                  | linear      | 31.3 | 39.6 | 2.2  | 5.9    | 23.2  | 0.0  |
|                  | NK1         | 37.0 | 30.9 | 3.1  | 26.2   | 9.3   | 0.2  |
|                  | NK2         | 37.9 | 31.5 | 3.7  | 26.1   | 12.5  | 0.2  |
| NCFF 3-2         | mlp         | 86.6 | 86.2 | 2.9  | 33.0   | 98.2  | 2.2  |
|                  | linear      | 25.1 | 25.6 | 0.0  | 10.8   | 2.4   | 0.0  |
|                  | NK1         | 24.6 | 23.2 | 0.0  | 11.5   | 39.3  | 0.0  |
|                  | NK2         | 25.3 | 23.3 | 0.0  | 12.2   | 20.3  | 0.0  |
|                  | mlp         | 27.6 | 22.7 | 0.0  | 13.2   | 60.1  | 0.0  |

Table 8: Full results for BTCVAE on 3dshapes

|                  |             | floor h | wall h | size  | orient | shape | obj h | NCFF  |
|------------------|-------------|---------|--------|-------|--------|-------|-------|-------|
| normal testset 0 | SNC         | 31.4    | 20.09  | 36.03 | 20.68  | 39.68 | 21.13 | 14.58 |
|                  | linear      | 99.13   | 99.08  | 59.18 | 82.33  | 29.42 | 99.03 | 17.38 |
|                  | NK1         | -       | -      | 99.09 | -      | 99.62 | -     | 98.97 |
|                  | NK2         | -       | -      | 98.88 | -      | 99.02 | -     | 97.98 |
|                  | NCFF excl 1 | 95.32   | 98.67  | 98.95 | 84.35  | 99.38 | 99.02 | -     |
|                  | NCFF excl 2 | 81.34   | 82.8   | 86.69 | 47.37  | 98.97 | 98.97 | -     |
|                  | MLP         | 100     | 100    | 98.76 | 99.98  | 99.81 | 100   | 98.51 |
| normal testset 1 | SNC         | 27.81   | 19.68  | 21.44 | 25.79  | 39.33 | 25.51 | 9.74  |
|                  | linear      | 98.83   | 98.75  | 31.02 | 83.3   | 37.69 | 98.96 | 10.72 |
|                  | NK1         | -       | -      | 98.93 | -      | 98.99 | -     | 97.92 |
|                  | NK2         | -       | -      | 96.43 | -      | 98.92 | -     | 95.41 |
|                  | NCFF excl 1 | 95.72   | 99.03  | 95.06 | 94.34  | 98.94 | 99.23 | -     |
|                  | NCFF excl 2 | 87.47   | 93.61  | 85.91 | 42.49  | 99.02 | 99.02 | -     |
|                  | MLP         | 100     | 100    | 99.72 | 99.98  | 100   | 100   | 99.72 |
| normal testset 2 | SNC         | 27.81   | 19.68  | 21.44 | 25.79  | 39.33 | 25.51 | 9.74  |
|                  | linear      | 98.87   | 99.1   | 31.58 | 73.53  | 35.15 | 99    | 9.22  |
|                  | NK1         | -       | -      | 98.92 | -      | 98.82 | -     | 98.74 |
|                  | NK2         | -       | -      | 96.9  | -      | 98.93 | -     | 95.86 |
|                  | NCFF excl 1 | 99.05   | 99.07  | 99.05 | 87.41  | 99.02 | 99.03 | -     |
|                  | NCFF excl 2 | 95.75   | 95.95  | 89.21 | 49.75  | 98.99 | 98.94 | -     |
|                  | MLP         | 100     | 100    | 100   | 99.03  | 100   | 100   | 100   |
| normal testset 3 | SNC         | 20.73   | 19.97  | 17.53 | 19.13  | 35.65 | 28.5  | 6.03  |
|                  | linear      | 98.94   | 98.77  | 17.01 | 83.2   | 67.16 | 98.97 | 10.27 |
|                  | NK1         | -       | -      | 98.95 | -      | 99.36 | -     | 98.31 |
|                  | NK2         | -       | -      | 98.95 | -      | 99.07 | -     | 98.02 |
|                  | NCFF excl 1 | 98.92   | 98.91  | 98.93 | 96.57  | 99.38 | 98.81 | -     |
|                  | NCFF excl 2 | 96.42   | 97.28  | 91.59 | 57.44  | 98.81 | 99    | -     |
|                  | MLP         | 100     | 100    | 99.71 | 99.99  | 100   | 100   | 99.71 |
| normal testset 4 | SNC         | 23.88   | 18.2   | 22.18 | 19.96  | 42.96 | 20.8  | 10.38 |
|                  | linear      | 98.96   | 99.06  | 18.62 | 83.3   | 70.9  | 99.03 | 12.27 |
|                  | NK1         | -       | -      | 98.98 | -      | 100   | -     | 98.98 |
|                  | NK2         | -       | -      | 94.42 | -      | 99    | -     | 93.58 |
|                  | NCFF excl 1 | 97.49   | 98.93  | 98.99 | 64.41  | 99.85 | 98.95 | -     |
|                  | NCFF excl 2 | 86.04   | 90.1   | 98.8  | 33.5   | 98.99 | 94.69 | -     |
|                  | MLP         | 100     | 100    | 99.99 | 99.85  | 100   | 100   | 99.99 |
| NCFF 0-0         | linear      | 93.59   | 95.03  | 45.3  | 90.57  | 76.21 | 76.68 | 26.85 |
|                  | NK1         | -       | -      | 45.42 | -      | 48.15 | -     | 2.16  |
|                  | NK2         | -       | -      | 45.25 | -      | 51.79 | -     | 2.49  |
|                  | mlp         | 99.11   | 100    | 45.35 | 99.96  | 49.21 | 80.89 | 0.03  |
| NCFF 5-2         | linear      | 99.12   | 98.65  | 1.41  | 97.91  | 95.38 | 90.47 | 1.41  |
|                  | NK1         | -       | -      | 32    | -      | 100   | -     | 32    |
|                  | NK2         | -       | -      | 3.75  | -      | 100   | -     | 3.75  |
|                  | mlp         | 100     | 100    | 0     | 100    | 100   | 93.93 | 0     |
| NCFF 2-1         | linear      | 100     | 100    | 0     | 88.6   | 74.31 | 99.99 | 0     |
|                  | NK1         | -       | -      | 18.69 | -      | 73.73 | -     | 14.02 |
|                  | NK2         | -       | -      | 50.34 | -      | 73.89 | -     | 38.66 |
|                  | mlp         | 100     | 100    | 43.31 | 99.95  | 73.91 | 100   | 36.43 |
| NCFF 3-1         | linear      | 99.85   | 99.88  | 0     | 83.13  | 84.91 | 100   | 0     |
|                  | NK1         | -       | -      | 78.05 | -      | 84.9  | -     | 64    |
|                  | NK2         | -       | -      | 41.27 | -      | 81.95 | -     | 27.46 |
|                  | mlp         | 100     | 100    | 12.79 | 100    | 84.64 | 100   | 0     |
| NCFF 3-2         | linear      | 99.04   | 99.73  | 0     | 85.46  | 99.99 | 99.87 | 0     |
|                  | NK1         | -       | -      | 5.95  | -      | 100   | -     | 5.95  |
|                  | NK2         | -       | -      | 0.12  | -      | 100   | -     | 0.12  |
|                  | mlp         | 100     | 100    | 0     | 99.69  | 100   | 99.93 | 0     |
| NCFF 7-3         | linear      | 99.99   | 99.21  | 8.26  | 83.51  | 25.83 | 100   | 2.92  |
|                  | NK1         | -       | -      | 25.55 | -      | 92.79 | -     | 22.2  |
|                  | NK2         | -       | -      | 13.59 | -      | 84.25 | -     | 13.09 |
|                  | mlp         | 100     | 99.99  | 39.67 | 97.91  | 90.04 | 100   | 30.63 |
| NCFF 0-3         | linear      | 99.94   | 100    | 0.04  | 87.69  | 4.49  | 69.07 | 0     |
|                  | NK1         | -       | -      | 46.62 | -      | 59.9  | -     | 20.53 |



Table 9: Full results for BVAE on 3dshapes

|                  |             | floor h | wall h | size  | orient | shape | obj h | NCFF  |
|------------------|-------------|---------|--------|-------|--------|-------|-------|-------|
| normal testset 0 | SNC         | 20.17   | 23.3   | 35.49 | 24.59  | 36.73 | 20.51 | 12.85 |
|                  | linear      | 99.06   | 99.25  | 55.55 | 87.31  | 35.56 | 99.03 | 13.93 |
|                  | NK1         | -       | -      | 99.1  | -      | 99.26 | -     | -     |
|                  | NK2         | -       | -      | 98.95 | -      | 98.89 | -     | 97.82 |
|                  | NCFF excl 1 | 99      | 98.97  | 96.92 | 57.59  | 99.77 | 99.13 | -     |
|                  | NCFF excl 2 | 93.12   | 91.86  | 84.05 | 34.11  | 99.86 | 98.58 | -     |
|                  | MLP         | 100     | 100    | 100   | 99.92  | 100   | 100   | 100   |
| normal testset 1 | SNC         | 22.05   | 17.04  | 16.64 | 15.78  | 41.45 | 17.33 | 7.38  |
|                  | linear      | 99      | 99.12  | 15.72 | 96.39  | 64.16 | 99.05 | 8.39  |
|                  | NK1         | -       | -      | 98.86 | -      | 99.26 | -     | 98.12 |
|                  | NK2         | -       | -      | 96.41 | -      | 98.99 | -     | 95.43 |
|                  | NCFF excl 1 | 98.95   | 99.06  | 99.04 | 93.06  | 98.87 | 98.83 | -     |
|                  | NCFF excl 2 | 92.94   | 90.57  | 93.66 | 57.28  | 99    | 99.01 | -     |
|                  | MLP         | 100     | 100    | 97.34 | 100    | 100   | 100   | 99.74 |
| normal testset 2 | SNC         | 29.08   | 18.85  | 28.5  | 13.11  | 36.68 | 18.89 | 10.97 |
|                  | linear      | 99.28   | 98.94  | 66.14 | 31.35  | 79.27 | 99.1  | 55.6  |
|                  | NK1         | -       | -      | 99.03 | -      | 99.08 | -     | 98.12 |
|                  | NK2         | -       | -      | 97.97 | -      | 98.9  | -     | 96.88 |
|                  | NCFF excl 1 | 98.66   | 98.97  | 98.89 | 96.66  | 99.21 | 99.06 | -     |
|                  | NCFF excl 2 | 88.08   | 85.79  | 87.96 | 63.75  | 98.96 | 95.55 | -     |
|                  | MLP         | 100     | 100    | 99.63 | 99.68  | 100   | 100   | 99.63 |
| normal testset 3 | SNC         | 25.47   | 18     | 36.35 | 19.76  | 35.68 | 22.22 | 14.7  |
|                  | linear      | 99.19   | 99.34  | 44.92 | 88.59  | 53.89 | 99    | 26.22 |
|                  | NK1         | -       | -      | 99.38 | -      | 99    | -     | 98.38 |
|                  | NK2         | -       | -      | 98.01 | -      | 99    | -     | 97.04 |
|                  | NCFF excl 1 | 98.91   | 98.92  | 94.31 | 93.18  | 99.99 | 99.39 | -     |
|                  | NCFF excl 2 | 98.11   | 92.35  | 76.62 | 52.11  | 99.02 | 99.08 | -     |
|                  | MLP         | 100     | 100    | 99.98 | 99.97  | 99.99 | 99.99 | 99.97 |
| normal testset 4 | SNC         | 22.48   | 20.08  | 25.16 | 65.74  | 35.74 | 21.26 | 9.35  |
|                  | linear      | 99.3    | 98.8   | 46.12 | 83.24  | 36.65 | 99.01 | 13.09 |
|                  | NK1         | -       | -      | 99.55 | -      | 99.29 | -     | 98.84 |
|                  | NK2         | -       | -      | 98.17 | -      | 98.92 | -     | 97.1  |
|                  | NCFF excl 1 | 98.88   | 99     | 99.01 | 73.41  | 99.04 | 99.13 | -     |
|                  | NCFF excl 2 | 92.6    | 96.95  | 94.27 | 38.71  | 98.92 | 98.94 | -     |
|                  | MLP         | 100     | 100    | 100   | 98.87  | 100   | 100   | 100   |
| NCFF 0-0         | linear      | 99.25   | 99.03  | 48.31 | 86.55  | 0     | 96.83 | 0     |
|                  | NK1         | -       | -      | 46.34 | -      | 46.55 | -     | 3.88  |
|                  | NK2         | -       | -      | 36.9  | -      | 52.23 | -     | 3.43  |
|                  | mlp         | 100     | 100    | 46.61 | 100    | 52.34 | 99.89 | 4.97  |
| NCFF 5-2         | linear      | 100     | 100    | 0     | 92.12  | 100   | 100   | 0     |
|                  | NK1         | -       | -      | 0     | -      | 100   | -     | 0     |
|                  | NK2         | -       | -      | 0     | -      | 99.87 | -     | 0     |
|                  | mlp         | 100     | 100    | 0     | 100    | 100   | 100   | 0     |
| NCFF 2-1         | linear      | 100     | 99.87  | 0     | 64.17  | 16.77 | 100   | 0     |
|                  | NK1         | -       | -      | 31.59 | -      | 81.72 | -     | 28.44 |
|                  | NK2         | -       | -      | 7.67  | -      | 76.67 | -     | 5.77  |
|                  | mlp         | 100     | 100    | 38.27 | 99.66  | 79.52 | 100   | 32.94 |
| NCFF 3-1         | linear      | 99.41   | 99.7   | 0     | 90.09  | 41.61 | 100   | 0     |
|                  | NK1         | -       | -      | 50.93 | -      | 15.1  | -     | 1.8   |
|                  | NK2         | -       | -      | 68.52 | -      | 18.6  | -     | 6.14  |
|                  | mlp         | 100     | 100    | 47.07 | 100    | 15.8  | 100   | 0     |
| NCFF 3-2         | linear      | 99.95   | 99.93  | 15.86 | 90.67  | 0     | 99.33 | 0     |
|                  | NK1         | -       | -      | 5.95  | -      | 100   | -     | 5.95  |
|                  | NK2         | -       | -      | 40.35 | -      | 99.01 | -     | 40.05 |
|                  | mlp         | 100     | 100    | 0     | 99.77  | 100   | 100   | 0     |
| NCFF 7-3         | linear      | 97.3    | 96.9   | 59.35 | 78.43  | 0     | 100   | 0     |
|                  | NK1         | -       | -      | 35.61 | -      | 96.09 | -     | 35.09 |
|                  | NK2         | -       | -      | 35.03 | -      | 88.95 | -     | 29.86 |
|                  | mlp         | 100     | 99.88  | 43.79 | 83.65  | 93.99 | 100   | 37.78 |
| NCFF 0-3         | linear      | 99.59   | 99.81  | 0     | 89.38  | 63.08 | 68.14 | 0     |
|                  | NK1         | -       | -      | 62.97 | -      | 45.37 | -     | 21.31 |

Table 10: Full results for FACTOR on 3dshapes

|                  |             | floor h | wall h | size  | orient | shape | obj h | NCFF  |
|------------------|-------------|---------|--------|-------|--------|-------|-------|-------|
| normal testset 0 | SNC         | 30.77   | 23.69  | 31.55 | 16     | 31.86 | 12.84 | 10.41 |
|                  | linear      | 98.94   | 98.97  | 38.43 | 38.27  | 31.99 | 74.98 | 11.52 |
|                  | NK1         | -       | -      | 64.7  | -      | 88.42 | -     | 54.93 |
|                  | NK2         | -       | -      | 68.93 | -      | 68.19 | -     | 44.36 |
|                  | NCFF excl 1 | 98.81   | 91.42  | 58.91 | 39.2   | 92.27 | 91.34 | -     |
|                  | NCFF excl 2 | 68.03   | 74.44  | 61.11 | 23.47  | 71.67 | 63.94 | -     |
|                  | MLP         | 100     | 99.54  | 67.03 | 98.46  | 98.9  | 98.99 | 66.2  |
| normal testset 1 | SNC         | -       | -      | -     | -      | -     | -     | -     |
|                  | linear      | 96.79   | 99.02  | 18.76 | 57.48  | 54.74 | 86.12 | 9.14  |
|                  | NK1         | -       | -      | 98.95 | -      | 99.07 | -     | 98.02 |
|                  | NK2         | -       | -      | 89.64 | -      | 98.56 | -     | 88.33 |
|                  | NCFF excl 1 | 71.14   | 99     | 92.94 | 93.44  | 98.11 | 96.26 | -     |
|                  | NCFF excl 2 | 43.72   | 64.14  | 68.53 | 38.44  | 90.27 | 77.41 | -     |
|                  | MLP         | 100     | 100    | 98.95 | 99.25  | 98.86 | 99.19 | 97.82 |
| normal testset 2 | SNC         | 21.96   | 20.48  | 23.11 | 15.92  | 26.72 | 18.29 | 6.63  |
|                  | linear      | 99.03   | 99.04  | 37.24 | 49.19  | 36.76 | 90.54 | 10.63 |
|                  | NK1         | -       | -      | 85.97 | -      | 98.97 | -     | 85.2  |
|                  | NK2         | -       | -      | 66.17 | -      | 96.04 | -     | 64.21 |
|                  | NCFF excl 1 | 90.7    | 95.84  | 90.88 | 83.87  | 99.08 | 98.98 | -     |
|                  | NCFF excl 2 | 76.32   | 70.68  | 66.23 | 53.14  | 95.09 | 83.91 | -     |
|                  | MLP         | 100     | 100    | 99.02 | 99.3   | 99.91 | 99.99 | 98.93 |
| normal testset 3 | SNC         | 24.19   | 41.23  | 17.67 | 18.79  | 41.61 | 23.71 | 7.63  |
|                  | linear      | 99.08   | 99.09  | 17.62 | 52.32  | 50.72 | 76.24 | 8.7   |
|                  | NK1         | -       | -      | 96.52 | -      | 99.09 | -     | 95.61 |
|                  | NK2         | -       | -      | 81.57 | -      | 93.16 | -     | 76.05 |
|                  | NCFF excl 1 | 79.03   | 81.78  | 86.41 | 57.75  | 98.78 | 99.01 | -     |
|                  | NCFF excl 2 | 54.14   | 46.17  | 62.67 | 32.97  | 87.83 | 77.92 | -     |
|                  | MLP         | 100     | 99.99  | 99.04 | 94.05  | 97.18 | 99.27 | 96.33 |
| normal testset 4 | SNC         | 21.77   | 20.19  | 21.08 | 15.01  | 31.19 | 23.71 | 6.46  |
|                  | linear      | 95.49   | 93.47  | 18.97 | 31.85  | 38.35 | 75.64 | 5.68  |
|                  | NK1         | -       | -      | 98.96 | -      | 99    | -     | 98    |
|                  | NK2         | -       | -      | 78.93 | -      | 84.64 | -     | 66.78 |
|                  | NCFF excl 1 | 57.42   | 72.05  | 99.03 | 60.61  | 94.3  | 87.4  | -     |
|                  | NCFF excl 2 | 39.54   | 51.49  | 57.98 | 32.79  | 72.5  | 64.89 | -     |
|                  | MLP         | 100     | 99.49  | 98.94 | 99.21  | 99.03 | 99.06 | 97.99 |
| NCFF 0-0         | linear      | 100     | 99.8   | 0     | 65.11  | 47.82 | 48.82 | 0     |
|                  | NK1         | -       | -      | 43.19 | -      | 33.47 | -     | 0.77  |
|                  | NK2         | -       | -      | 42.47 | -      | 32.86 | -     | 5.69  |
|                  | mlp         | 100     | 100    | 38.69 | 100    | 40.93 | 99.16 | 0.73  |
| NCFF 5-2         | linear      | 93.81   | 95.39  | 0     | 59.65  | 56    | 77.95 | 0     |
|                  | NK1         | -       | -      | 32    | -      | 100   | -     | 32    |
|                  | NK2         | -       | -      | 26.28 | -      | 96.82 | -     | 26.51 |
|                  | mlp         | 100     | 100    | 0     | 99.97  | 100   | 100   | 0     |
| NCFF 2-1         | linear      | 88.57   | 90.95  | 0     | 33.27  | 2.14  | 61.83 | 0     |
|                  | NK1         | -       | -      | 12.96 | -      | 49.47 | -     | 9.41  |
|                  | NK2         | -       | -      | 6.58  | -      | 39.47 | -     | 2.75  |
|                  | mlp         | -       | -      | 1.92  | 99.32  | 51.35 | 100   | 0.91  |
| NCFF 3-1         | linear      | 93.55   | 88.59  | 0     | 56.3   | 0     | 65.76 | 0     |
|                  | NK1         | -       | -      | 67.06 | -      | 95.35 | -     | 61.92 |
|                  | NK2         | -       | -      | 47.03 | -      | 86.03 | -     | 59.64 |
|                  | mlp         | 100     | 100    | 49.81 | 100    | 98.73 | 100   | 48.74 |
| NCFF 3-2         | linear      | 100     | 100    | 0     | 83.4   | 99.06 | 100   | 0     |
|                  | NK1         | -       | -      | 31.6  | -      | 99.02 | -     | 31.34 |
|                  | NK2         | -       | -      | 44.69 | -      | 99.37 | -     | 44.67 |
|                  | mlp         | 100     | 100    | 11.51 | 99.8   | 99.9  | 100   | 11.51 |
| NCFF 7-3         | linear      | 91.25   | 89.19  | 13.79 | 51.55  | 0     | 97.49 | 0     |
|                  | NK1         | -       | -      | 31.27 | -      | 69.24 | -     | 7.17  |
|                  | NK2         | -       | -      | 29.41 | -      | 74.3  | -     | 10.93 |
|                  | mlp         | 100     | 95.83  | 26.48 | 94.97  | 67.05 | 100   | 2.47  |
| NCFF 0-3         | linear      | 98.27   | 99.94  | 14.73 | 58.26  | 61.55 | 90.27 | 0.32  |
|                  | NK1         | -       | -      | 32.35 | -      | 40.42 | -     | 0.14  |

Table 11: Full results for LEI on 3dshapes

|                  |             | floor h | wall h | size   | orient | shape  | obj h  | NCFF |
|------------------|-------------|---------|--------|--------|--------|--------|--------|------|
| normal testset 0 | SNC         | -       | -      | -      | -      | -      | -      | -    |
|                  | linear      | -       | -      | -      | -      | -      | -      | -    |
|                  | NK1         | -       | -      | -      | -      | -      | -      | -    |
|                  | NK2         | -       | -      | -      | -      | -      | -      | -    |
|                  | NCFF excl 1 | -       | -      | -      | -      | -      | -      | -    |
|                  | NCFF excl 2 | -       | -      | -      | -      | -      | -      | -    |
|                  | MLP         | 100     | 100    | 100    | 100    | 100    | 100    | 100  |
| normal testset 1 | SNC         | -       | -      | -      | -      | -      | -      | -    |
|                  | linear      | -       | -      | -      | -      | -      | -      | -    |
|                  | NK1         | -       | -      | -      | -      | -      | -      | -    |
|                  | NK2         | -       | -      | -      | -      | -      | -      | -    |
|                  | NCFF excl 1 | -       | -      | -      | -      | -      | -      | -    |
|                  | NCFF excl 2 | -       | -      | -      | -      | -      | -      | -    |
|                  | MLP         | 100     | 100    | 100    | 100    | 100    | 100    | 100  |
| normal testset 2 | SNC         | -       | -      | -      | -      | -      | -      | -    |
|                  | linear      | -       | -      | -      | -      | -      | -      | -    |
|                  | NK1         | -       | -      | -      | -      | -      | -      | -    |
|                  | NK2         | -       | -      | -      | -      | -      | -      | -    |
|                  | NCFF excl 1 | -       | -      | -      | -      | -      | -      | -    |
|                  | NCFF excl 2 | -       | -      | -      | -      | -      | -      | -    |
|                  | MLP         | 9.2     | 100    | 100    | 100    | 100    | 100    | 100  |
| normal testset 3 | SNC         | -       | -      | -      | -      | -      | -      | -    |
|                  | linear      | -       | -      | -      | -      | -      | -      | -    |
|                  | NK1         | -       | -      | -      | -      | -      | -      | -    |
|                  | NK2         | -       | -      | -      | -      | -      | -      | -    |
|                  | NCFF excl 1 | -       | -      | -      | -      | -      | -      | -    |
|                  | NCFF excl 2 | -       | -      | -      | -      | -      | -      | -    |
|                  | MLP         | 7.3     | 100    | 100    | 100    | 100    | 100    | 100  |
| normal testset 4 | SNC         | -       | -      | -      | -      | -      | -      | -    |
|                  | linear      | -       | -      | -      | -      | -      | -      | -    |
|                  | NK1         | -       | -      | -      | -      | -      | -      | -    |
|                  | NK2         | -       | -      | -      | -      | -      | -      | -    |
|                  | NCFF excl 1 | -       | -      | -      | -      | -      | -      | -    |
|                  | NCFF excl 2 | -       | -      | -      | -      | -      | -      | -    |
|                  | MLP         | 20      | 100    | 100    | 100    | 100    | 100    | 100  |
| NCFF 0-0         | linear      | -       | -      | -      | -      | -      | -      | -    |
|                  | NK1         | -       | -      | -      | -      | -      | -      | -    |
|                  | NK2         | 11.1    | 90.9   | 18.8   | 100    | 29.8   | 93     | 1.29 |
|                  | mlp         | -       | -      | -      | -      | -      | -      | -    |
| NCFF 5-2         | linear      | -       | -      | -      | -      | -      | -      | -    |
|                  | NK1         | -       | -      | -      | -      | -      | -      | -    |
|                  | NK2         | 8.5     | 92.4   | 4.2    | 100    | 26.9   | 94.8   | 0.57 |
|                  | mlp         | -       | -      | -      | -      | -      | -      | -    |
| NCFF 2-1         | linear      | -       | -      | -      | -      | -      | -      | -    |
|                  | NK1         | -       | -      | -      | -      | -      | -      | -    |
|                  | NK2         | 8.2     | 90.5   | 12.2   | 100    | 27.8   | 93.9   | 4.25 |
|                  | mlp         | -       | -      | -      | -      | -      | -      | -    |
| NCFF 3-1         | linear      | -       | -      | -      | -      | -      | -      | -    |
|                  | NK1         | -       | -      | -      | -      | -      | -      | -    |
|                  | NK2         | 13.9    | 90.2   | 9.4    | 100    | 24.7   | 91.3   | 3.22 |
|                  | mlp         | -       | -      | -      | -      | -      | -      | -    |
| NCFF 3-2         | linear      | -       | -      | -      | -      | -      | -      | -    |
|                  | NK1         | -       | -      | -      | -      | -      | -      | -    |
|                  | NK2         | 10.1    | 96.3   | 10.2   | 100    | 24.1   | 94.7   | 2.17 |
|                  | mlp         | -       | -      | -      | -      | -      | -      | -    |
| NCFF 7-3         | linear      | -       | -      | -      | -      | -      | -      | -    |
|                  | NK1         | -       | -      | -      | -      | -      | -      | -    |
|                  | NK2         | -       | -      | -      | -      | -      | -      | -    |
|                  | mlp         | 10.087  | 96.02  | 12.793 | 99.94  | 25.027 | 96.347 | 2    |
| NCFF 0-3         | linear      | -       | -      | -      | -      | -      | -      | -    |
|                  | NK1         | -       | -      | -      | -      | -      | -      | -    |

Table 12: Full results for PVAE on 3dshapes

|                  |             | floor h | wall h | size  | orient | shape | obj h | NCFF  |
|------------------|-------------|---------|--------|-------|--------|-------|-------|-------|
| normal testset 0 | SNC         | 99.86   | 37.53  | 38.02 | 99.53  | 93.45 | 82.14 | 31.89 |
|                  | linear      | 89.72   | 96.97  | 17.46 | 78.2   | 82.05 | 82.2  | 13.72 |
|                  | NK1         | 100     | 53.64  | 93.92 | 99.16  | 99.11 | 34.71 | 32.84 |
|                  | NK2         | 95.96   | 87.24  | 90.72 | 21.31  | 97.36 | 29.51 | 26.67 |
|                  | NCFF excl 1 | 22.94   | 93.37  | 28.48 | 13.78  | 27.66 | 98.45 | -     |
|                  | NCFF excl 2 | 15.59   | 80.7   | 24.52 | 13.25  | 22.97 | -     | -     |
|                  | MLP         | 99.07   | 98.86  | 90.97 | 99.07  | 99.03 | 98.94 | 90.13 |
| normal testset 1 | SNC         | 99.81   | 39.3   | 72.16 | 86.71  | 95.74 | 99.96 | 72.15 |
|                  | linear      | 99.04   | 90.69  | 33.07 | 15.41  | 89.03 | 98.97 | 30.04 |
|                  | NK1         | 37.65   | 100    | 99.65 | 98.84  | 100   | 33.53 | 33.47 |
|                  | NK2         | 100     | 18.41  | 99.87 | 87.87  | 31.04 | -     | 30.99 |
|                  | NCFF excl 1 | 87.08   | 31.35  | 38.22 | 24.47  | 25.82 | 100   | -     |
|                  | NCFF excl 2 | 71.66   | 17.97  | 30.66 | 19.61  | 16.15 | -     | -     |
|                  | MLP         | 98.86   | 99.37  | 98.94 | 95.95  | 99.12 | 99.7  | 98.07 |
| normal testset 2 | SNC         | 99.88   | 34.63  | 20.25 | 99.78  | 93.1  | 69.49 | 12.11 |
|                  | linear      | 91.98   | 90.53  | 50.64 | 9.16   | 79.54 | 42.59 | 40.33 |
|                  | NK1         | 99.89   | 96.71  | 66.62 | 37.42  | 97.94 | 39.91 | 26    |
|                  | NK2         | 42.06   | 28.18  | 98.76 | 100    | 92.44 | 26.78 | 26.39 |
|                  | NCFF excl 1 | 31.3    | 70.71  | 93.07 | 27.94  | 50.03 | 97.51 | -     |
|                  | NCFF excl 2 | 23.31   | 55.38  | 75.43 | 23.83  | 45.65 | -     | -     |
|                  | MLP         | 98.87   | 99.04  | 96.26 | 30.39  | 98.95 | 98.84 | 95.29 |
| normal testset 3 | SNC         | 30.84   | 31.22  | 29.36 | 99.52  | 66.94 | 34.49 | 8.79  |
|                  | linear      | 97.81   | 94.28  | 28.81 | 76.05  | 87.9  | 57.23 | 25.61 |
|                  | NK1         | 100     | 45.95  | 98.37 | 99.99  | 98.97 | 32.87 | 32.35 |
|                  | NK2         | 100     | 76.21  | 69.73 | 100    | 98.51 | 46.92 | 34.93 |
|                  | NCFF excl 1 | 37.27   | 98.93  | 34.16 | 18.55  | 35.64 | 98.75 | -     |
|                  | NCFF excl 2 | 16.44   | 72.2   | 27.05 | 9.21   | 19.44 | -     | -     |
|                  | MLP         | 98.98   | 98.34  | 98.12 | 99.29  | 99.11 | 99.05 | 97.32 |
| normal testset 4 | SNC         | 99.88   | 47.2   | 55.89 | 99.34  | 97.51 | 67.04 | 39.71 |
|                  | linear      | 96.44   | 95.66  | 22.61 | 77.58  | 92.48 | 58.63 | 20.56 |
|                  | NK1         | 100     | 46.94  | 98.87 | 99.99  | 98.46 | 33.87 | 33.49 |
|                  | NK2         | 100     | 16.64  | 99.89 | 100    | 100   | 33.44 | 33.41 |
|                  | NCFF excl 1 | 44.16   | 95.6   | 44.48 | 20.59  | 39.88 | 98.96 | -     |
|                  | NCFF excl 2 | 14.69   | 74.5   | 34.57 | 11.31  | 25.42 | -     | -     |
|                  | MLP         | 98.93   | 99.1   | 98.98 | 99.05  | 99.01 | 99.07 | 97.99 |
| NCFF 0-0         | linear      | 92.95   | 91.58  | 0.75  | 76.03  | 80.19 | 0     | 0.43  |
|                  | NK1         | 100     | 45.12  | 5.38  | 99.94  | 94.03 | 37.38 | 3.33  |
|                  | NK2         | 100     | 26.95  | 21.23 | 100    | 1.5   | 79.9  | 0.38  |
|                  | mlp         | 99.07   | 99.04  | 31.42 | 99.35  | 92.53 | 67.45 | 27.71 |
| NCFF 5-2         | linear      | 98.63   | 91.13  | 0     | 89.03  | 94.97 | 13.33 | 0     |
|                  | NK1         | 32.29   | 100    | 0.03  | 99.69  | 100   | 17.73 | 0.01  |
|                  | NK2         | 100     | 10.72  | 0     | 43.59  | 18.02 | 92.52 | 0     |
|                  | mlp         | 0       | 99.34  | 2.49  | 99.71  | 99.87 | 99.93 | 2.49  |
| NCFF 2-1         | linear      | 91.69   | 93.41  | 57.2  | 85.97  | 97.07 | 0     | 55.72 |
|                  | NK1         | 98.39   | 97.13  | 0     | 100    | 100   | 0.01  | 0     |
|                  | NK2         | 11.71   | 100    | 12.59 | 1      | 4.68  | 99.99 | 0.51  |
|                  | mlp         | 99.87   | 99.12  | 94.9  | 99.71  | 99.57 | 64.74 | 94.53 |
| NCFF 3-1         | linear      | 96.72   | 91.91  | 0     | 83.17  | 86.87 | 99.97 | 0     |
|                  | NK1         | 30.27   | 100    | 0     | 100    | 100   | 2.39  | 0     |
|                  | NK2         | 92.65   | 9.85   | 0     | 100    | 2.49  | 11.3  | 0     |
|                  | mlp         | 99.91   | 97.51  | 0     | 99.07  | 99.82 | 99.94 | 0     |
| NCFF 3-2         | linear      | 93.36   | 98.02  | 0     | 86.93  | 89.82 | 92.88 | 0     |
|                  | NK1         | 93.36   | 98.02  | 0     | 86.93  | 89.82 | 92.88 | 0     |
|                  | NK2         | 100     | 100    | 90.05 | 11.62  | 0.17  | -     | 0.13  |
|                  | mlp         | 99.55   | 99.75  | 1.97  | 99.49  | 99.69 | 99.95 | 1.97  |
| NCFF 7-3         | linear      | 94.49   | 89.35  | 0     | 67.2   | 71.25 | 0.64  | 0     |
|                  | NK1         | 7.91    | 100    | 6.38  | 64.47  | 99.88 | 6.17  | 0.27  |
|                  | NK2         | 100     | 92.95  | 30.13 | 64.41  | 99.69 | 12.35 | 1.85  |
|                  | mlp         | 98.38   | 96.93  | 18.09 | 67.31  | 96.62 | 98.57 | 17.62 |
| NCFF 0-3         | linear      | 98.17   | 97.79  | 0     | 80.65  | 80.35 | 28.11 | 0     |
|                  | NK1         | 100     | 15.14  | 3.29  | 100    | 79.53 | 15.04 | 0.48  |

Table 13: Full results for BTCVAE on mpi3d

|                  |             | hor   | vert  | size  | obj h | shape | cam he | bg h  | NCFF  |
|------------------|-------------|-------|-------|-------|-------|-------|--------|-------|-------|
| normal testset 0 | SNC         | 5.04  | 4.36  | 65.64 | 70.84 | 23.31 | 67.86  | 55.5  | 14.34 |
|                  | linear      | 13.54 | 10.34 | 75.53 | 70.25 | 32.45 | 99.84  | 40.92 | 23.82 |
|                  | NK1         | -     | -     | 95.74 | -     | 75.89 | -      | -     | 73.37 |
|                  | NK2         | -     | -     | 89.69 | -     | 69.84 | -      | -     | 63.52 |
|                  | NCFF excl 1 | 63.33 | 46.12 | 95.09 | 85.05 | 71.45 | 93.98  | 48.8  | -     |
|                  | NCFF excl 2 | 49.69 | 31.77 | 90.37 | 50.51 | 58.22 | 66     | 45.55 | -     |
|                  | MLP         | 85.59 | 66.92 | 98.79 | 99.44 | 86.87 | 0      | 100   | 86.06 |
| normal testset 1 | SNC         | 5.81  | 5.58  | 69.62 | 71.87 | 28.22 | 67.77  | 55.6  | 19.24 |
|                  | linear      | 17.2  | 12.7  | 76.87 | 75.5  | 35.48 | 100    | 46.89 | 26.01 |
|                  | NK1         | -     | -     | 96.83 | -     | 78.42 | -      | -     | 76.24 |
|                  | NK2         | -     | -     | 92.4  | -     | 67.72 | -      | -     | 63.03 |
|                  | NCFF excl 1 | 66.92 | 45.35 | 93.14 | 77.16 | 75.92 | 88.31  | 38.18 | -     |
|                  | NCFF excl 2 | 46.46 | 29.96 | 86.08 | 54.16 | 60.45 | 67.9   | 37.97 | -     |
|                  | MLP         | 86.95 | 67.02 | 98.92 | 99.73 | 86.77 | 0      | 100   | 86.1  |
| normal testset 2 | SNC         | 6.75  | 4.49  | 57.17 | 39.4  | 24.34 | 77.33  | 99.99 | 13.3  |
|                  | linear      | 15.48 | 9.25  | 65.72 | 43.77 | 31.83 | 99.54  | 100   | 20.39 |
|                  | NK1         | -     | -     | 95.76 | -     | 71.56 | -      | -     | 68.87 |
|                  | NK2         | -     | -     | 88.66 | -     | 66.61 | -      | -     | 59.63 |
|                  | NCFF excl 1 | 65.71 | 45.85 | 96.39 | 79.77 | 69.16 | 89.75  | 35.46 | -     |
|                  | NCFF excl 2 | 43.05 | 26.78 | 90.32 | 57.04 | 60.32 | 63.81  | 34.78 | -     |
|                  | MLP         | 86.18 | 65.38 | 97.93 | 99.38 | 81.62 | 0      | 0     | 80.38 |
| normal testset 3 | SNC         | 6.41  | 5.38  | 59.49 | 75.47 | 26.9  | 76.81  | 99.99 | 16.25 |
|                  | linear      | 13.13 | 7.52  | 66.07 | 74.07 | 34.6  | 99.9   | 99.99 | 22.44 |
|                  | NK1         | -     | -     | 95.29 | -     | 74.1  | -      | -     | 70.9  |
|                  | NK2         | -     | -     | 90.92 | -     | 63.42 | -      | -     | 58.13 |
|                  | NCFF excl 1 | 72.43 | 45.52 | 94.8  | 78.01 | 71.3  | 88.29  | 37.66 | -     |
|                  | NCFF excl 2 | 51.77 | 27.64 | 88.49 | 53.09 | 60.94 | 66.1   | 36.48 | -     |
|                  | MLP         | 87.72 | 69.01 | 98.36 | 99.92 | 82.72 | 0      | 0     | 81.69 |
| normal testset 4 | SNC         | 6.02  | 4.5   | 64.64 | 77.51 | 23.02 | 68.2   | 55.64 | 14.48 |
|                  | linear      | 15.39 | 9.03  | 70.9  | 76.98 | 34.63 | 99.55  | 48.02 | 23.89 |
|                  | NK1         | -     | -     | 88.74 | -     | 57.13 | -      | -     | 51.63 |
|                  | NK2         | -     | -     | 84.95 | -     | 51.2  | -      | -     | 44.26 |
|                  | NCFF excl 1 | 50.37 | 32.87 | 90.09 | 77.02 | 59.48 | 92.24  | 47.27 | -     |
|                  | NCFF excl 2 | 34.46 | 22.59 | 82.22 | 64.6  | 49.32 | 81.32  | 45.64 | -     |
|                  | MLP         | 67.18 | 48.54 | 93.79 | 98.46 | 68.25 | 0      | 99.9  | 65.03 |
| NCFF 0-0         | linear      | 15.62 | 9.01  | 97.71 | 40.08 | 0.03  | 100    | 53.47 | 0.01  |
|                  | NK1         | -     | -     | 99.9  | -     | 13.21 | -      | -     | 13.16 |
|                  | NK2         | -     | -     | 98.67 | -     | 25.11 | -      | -     | 24.7  |
|                  | mlp         | 69.87 | 53.41 | 99.87 | 96.95 | 2.3   | 0      | 100   | 2.3   |
| NCFF 1-4         | linear      | 18.32 | 12.63 | 68.95 | 72.15 | 1.31  | 99.99  | 45.06 | 0     |
|                  | NK1         | -     | -     | 92.13 | -     | 34.81 | -      | -     | 31.18 |
|                  | NK2         | -     | -     | 86.06 | -     | 19.68 | -      | -     | 15.22 |
|                  | mlp         | 54.29 | 40.48 | 93.83 | 99.66 | 13.79 | 0      | 100   | 11.74 |
| NCFF 0-5         | linear      | 6.51  | 10.99 | 93.31 | 38.7  | 20.3  | 100    | 44.35 | 20.3  |
|                  | NK1         | -     | -     | 99.91 | -     | 7.76  | -      | -     | 7.54  |
|                  | NK2         | -     | -     | 87.87 | -     | 20.56 | -      | -     | 17.48 |
|                  | mlp         | 51.64 | 41.37 | 88.87 | 95.26 | 10.13 | 0      | 99.98 | 5.8   |
| NCFF 1-3         | linear      | 15.55 | 8.44  | 86.18 | 60.64 | 0     | 99.98  | 45.47 | 0     |
|                  | NK1         | -     | -     | 99.45 | -     | 2.32  | -      | -     | 2.31  |
|                  | NK2         | -     | -     | 96.83 | -     | 2.03  | -      | -     | 2     |
|                  | mlp         | 85.38 | 64.75 | 99.97 | 99.69 | 0.53  | 0      | 98.46 | 0.53  |
| NCFF 1-1         | linear      | 12.76 | 8.45  | 78.44 | 74    | 0     | 99.18  | 44.43 | 0     |
|                  | NK1         | -     | -     | 99.08 | -     | 6.52  | -      | -     | 6.26  |
|                  | NK2         | -     | -     | 92.84 | -     | 7.63  | -      | -     | 7.18  |
|                  | mlp         | 67.06 | 51.68 | 99.9  | 99.53 | 11.52 | 0      | 100   | 11.47 |
| NCFF 0-2         | linear      | 18.69 | 9.13  | 73.26 | 78.03 | 0     | 100    | 44.74 | 0     |
|                  | NK1         | -     | -     | 97.34 | -     | 3.4   | -      | -     | 3.17  |
|                  | NK2         | -     | -     | 90.5  | -     | 3.13  | -      | -     | 2.75  |
|                  | mlp         | 89.86 | 70.4  | 98.49 | 99.76 | 0.24  | 0      | 99.99 | 0.2   |

Table 14: Full results for BVAE on mpi3d

|                  |             | hor   | vert  | size  | obj h | shape | cam he | bg h  | NCFF  |
|------------------|-------------|-------|-------|-------|-------|-------|--------|-------|-------|
| normal testset 0 | SNC         | 5.5   | 5.4   | 66.06 | 73.8  | 25.93 | 94.84  | 54.61 | 17.56 |
|                  | linear      | 17.63 | 11.68 | 77.79 | 76.17 | 36.94 | 99.71  | 48.3  | 28.21 |
|                  | NK1         | -     | -     | 97.63 | -     | 76.75 | -      | -     | 75.29 |
|                  | NK2         | -     | -     | 93.09 | -     | 61.52 | -      | -     | 57.66 |
|                  | NCFF excl 1 | 72.83 | 44.89 | 94.73 | 72.82 | 79.24 | 91.12  | 52.08 | -     |
|                  | NCFF excl 2 | 48.69 | 28.54 | 87.99 | 53.5  | 59.74 | 89.22  | 51.57 | -     |
|                  | MLP         | 86.51 | 70.23 | 98.92 | 99.82 | 88.28 | 0      | 99.99 | 87.61 |
| normal testset 1 | SNC         | 5.93  | 4.41  | 66.69 | 78.82 | 27.22 | 74.31  | 52.44 | 17.38 |
|                  | linear      | 16.87 | 9.24  | 76.29 | 88.91 | 34.92 | 100    | 45.3  | 25.93 |
|                  | NK1         | -     | -     | 96.29 | -     | 77.56 | -      | -     | 75.02 |
|                  | NK2         | -     | -     | 91.29 | -     | 69.5  | -      | -     | 64.16 |
|                  | NCFF excl 1 | 66.69 | 46.28 | 94.35 | 72.25 | 76.04 | 93.58  | 72.27 | -     |
|                  | NCFF excl 2 | 45.33 | 31.59 | 89.01 | 62.91 | 63.88 | 74.5   | 70.98 | -     |
|                  | MLP         | 86.01 | 66.49 | 98.96 | 99.9  | 87.26 | 0      | 99.83 | 86.56 |
| normal testset 2 | SNC         | 5.85  | 5.49  | 59.77 | 57.65 | 22.92 | 87.11  | 36.2  | 13.82 |
|                  | linear      | 15.54 | 14.62 | 71.78 | 73.45 | 34.85 | 99.89  | 36.64 | 24.08 |
|                  | NK1         | -     | -     | 94.7  | -     | 75.19 | -      | -     | 71.87 |
|                  | NK2         | -     | -     | 89.73 | -     | 66.43 | -      | -     | 60.42 |
|                  | NCFF excl 1 | 67.6  | 41.56 | 95.67 | 89.18 | 74.21 | 88.93  | 80.82 | -     |
|                  | NCFF excl 2 | 47.32 | 32.03 | 90.58 | 81.41 | 64.72 | 71.63  | 76.35 | -     |
|                  | MLP         | 85.17 | 68.24 | 98.68 | 99.58 | 84.47 | 0      | 99.99 | 83.71 |
| normal testset 3 | SNC         | 5.73  | 5.02  | 62.93 | 72.61 | 27.47 | 73.22  | 55.5  | 17.16 |
|                  | linear      | 15.54 | 14.62 | 71.78 | 73.45 | 34.85 | 99.89  | 36.64 | 24.08 |
|                  | NK1         | -     | -     | 94.75 | -     | 75.34 | -      | -     | 71.85 |
|                  | NK2         | -     | -     | 89.73 | -     | 66.43 | -      | -     | 60.42 |
|                  | NCFF excl 1 | 67.6  | 41.56 | 95.67 | 89.18 | 74.21 | 88.93  | 80.82 | -     |
|                  | NCFF excl 2 | 47.32 | 32.03 | 90.58 | 81.41 | 64.72 | 71.63  | 76.35 | -     |
|                  | MLP         | 87.32 | 67.92 | 98.9  | 99.74 | 84.63 | 0      | 100   | 83.94 |
| normal testset 4 | SNC         | 6.35  | 4.65  | 56.47 | 62.55 | 27.04 | 58.91  | 40.52 | 15.17 |
|                  | linear      | 14.15 | 8.5   | 64.75 | 97.15 | 33.86 | 99.08  | 44.15 | 21.45 |
|                  | NK1         | -     | -     | 95.33 | -     | 77.6  | -      | -     | 74.43 |
|                  | NK2         | -     | -     | 91.22 | -     | 65.77 | -      | -     | 60.22 |
|                  | NCFF excl 1 | 70.52 | 47.31 | 96.17 | 84.19 | 73.69 | 98.45  | 76.71 | -     |
|                  | NCFF excl 2 | 54.99 | 34.46 | 92.72 | 60.88 | 59.78 | 85.66  | 65.59 | -     |
|                  | MLP         | 86.68 | 68.55 | 98.88 | 99.86 | 84.24 | 0      | 99.99 | 83.54 |
| NCFF 0-0         | linear      | 9.68  | 7.66  | 80.89 | 95.2  | 0.13  | 99.37  | 38.2  | 0     |
|                  | NK1         | -     | -     | 99.27 | -     | 13.01 | -      | -     | 12.83 |
|                  | NK2         | -     | -     | 96.08 | -     | 21.98 | -      | -     | 20.96 |
|                  | mlp         | 75.16 | 55.28 | 99.86 | 98.63 | 20.23 | 0      | 100   | 20.12 |
| NCFF 1-4         | linear      | 16.5  | 6.34  | 42.34 | 91.57 | 5.06  | 99     | 99.85 | 0     |
|                  | NK1         | -     | -     | 91.06 | -     | 3.91  | -      | -     | 2.53  |
|                  | NK2         | -     | -     | 83.4  | -     | 11.88 | -      | -     | 8.49  |
|                  | mlp         | 51.51 | 37.19 | 94.21 | 99.93 | 17.16 | 0      | 0     | 15.56 |
| NCFF 0-5         | linear      | 12.55 | 12.39 | 83.41 | 90.54 | 26.06 | 99.98  | 50.46 | 25.62 |
|                  | NK1         | -     | -     | 87.32 | -     | 7.82  | -      | -     | 6.06  |
|                  | NK2         | -     | -     | 67.55 | -     | 9.47  | -      | -     | 3.46  |
|                  | mlp         | 56.62 | 47.98 | 93.39 | 99.97 | 21.4  | 0      | 100   | 15.56 |
| NCFF 1-3         | linear      | 16.35 | 10.47 | 67.32 | 81.67 | 0     | 99.36  | 57.25 | 0     |
|                  | NK1         | -     | -     | 99.48 | -     | 2.52  | -      | -     | 2.52  |
|                  | NK2         | -     | -     | 99.08 | -     | 1.49  | -      | -     | 1.46  |
|                  | mlp         | 87.19 | 65.85 | 99.96 | 99.98 | 0.62  | 0      | 100   | 0.62  |
| NCFF 1-1         | linear      | 15.79 | 10.85 | 92.48 | 74.8  | 0     | 97.95  | 55.88 | 0     |
|                  | NK1         | -     | -     | 99.54 | -     | 17.17 | -      | -     | -     |
|                  | NK2         | -     | -     | 98.57 | -     | 8.64  | -      | -     | -     |
|                  | mlp         | 73.84 | 56.43 | 99.98 | 99.77 | 7.93  | 0      | 99.7  | 7.91  |
| NCFF 0-2         | linear      | 16.22 | 10.56 | 70.52 | 80.97 | 0     | 99.94  | 46.48 | 0     |
|                  | NK1         | -     | 14    | 94.22 | -     | 1.05  | -      | -     | 0.85  |
|                  | NK2         | -     | -     | 86.32 | -     | 0.9   | -      | -     | 0.59  |
|                  | mlp         | 86.08 | 67.12 | 99.24 | 99.98 | 0.55  | 0      | 100   | 0.52  |

Table 15: Full results for FACTOR on mpi3d

|                  |             | hor   | vert  | size  | obj h | shape | cam he | bg h  | NCFF   |
|------------------|-------------|-------|-------|-------|-------|-------|--------|-------|--------|
| normal testset 0 | SNC         | 6.09  | 5.05  | 64.12 | 40.64 | 24.57 | 68.75  | 47.16 | 15.79  |
|                  | linear      | 12.66 | 8.85  | 63.69 | 52.95 | 36.11 | 99.1   | 36.79 | 23.72  |
|                  | NK1         | -     | -     | 91.88 | -     | 69.83 | -      | -     | 64.56  |
|                  | NK2         | -     | -     | 91.43 | -     | 67.03 | -      | -     | 61.58  |
|                  | NCFF excl 1 | 55.3  | 34.02 | 90.71 | 78.27 | 66.5  | 83.96  | 60.66 | -      |
|                  | NCFF excl 2 | 37.06 | 21.26 | 90.09 | 62.37 | 65    | 61.36  | 59.61 | -      |
|                  | MLP         | 77.95 | 59.73 | 97.43 | 98.88 | 80.46 | 0      | 99.83 | 78.84  |
| normal testset 1 | SNC         | 5.27  | 4.45  | 56.76 | 69.91 | 27.07 | 75.57  | 52.86 | 15.24] |
|                  | linear      | 6.3   | 9.78  | 61.18 | 76.65 | 35.1  | 99.33  | 35.35 | 21.39  |
|                  | NK1         | -     | -     | 93.82 | -     | 71.77 | -      | -     | 67.55  |
|                  | NK2         | -     | -     | 88.2  | -     | 61.37 | -      | -     | 54.56  |
|                  | NCFF excl 1 | 62.39 | 36.9  | 93.18 | 69.21 | 70.71 | 84.49  | 63.26 | -      |
|                  | NCFF excl 2 | 41.9  | 25.47 | 85.95 | 51.64 | 57.1  | 67.02  | 62.91 | -      |
|                  | MLP         | 80.17 | 62.57 | 98.12 | 99.51 | 83.14 | 0      | 99.88 | 82     |
| normal testset 2 | SNC         | 5.2   | 4.55  | 64.89 | 34.89 | 26    | 70.51  | 50.2  | 16.53  |
|                  | linear      | 15.99 | 10.08 | 75.54 | 46.83 | 41.87 | 99.68  | 45.27 | 31.97  |
|                  | NK1         | -     | -     | 95.09 | -     | 77.2  | -      | -     | 73.99  |
|                  | NK2         | -     | -     | 89.24 | -     | 67.87 | -      | -     | 61.28  |
|                  | NCFF excl 1 | 57.28 | 38.14 | 91.45 | 79.42 | 73.66 | 84.97  | 59.38 | -      |
|                  | NCFF excl 2 | 38.11 | 26.57 | 84.82 | 68.07 | 59.59 | 65.28  | 59.16 | -      |
|                  | MLP         | 79.81 | 60.92 | 98.25 | 98.73 | 84.47 | 0      | 99.79 | 83.31  |
| normal testset 3 | SNC         | 6.13  | 4.51  | 61.02 | 35.7  | 24.58 | 74.69  | 38.31 | 15.23  |
|                  | linear      | 11.41 | 9.66  | 69.75 | 77.15 | 39.51 | 98.97  | 38.68 | 27.03  |
|                  | NK1         | -     | -     | 93.52 | -     | 73.47 | -      | -     | 69.42  |
|                  | NK2         | -     | -     | 86.09 | -     | 61.29 | -      | -     | 53.19  |
|                  | NCFF excl 1 | 59.1  | 39.34 | 92.18 | 80.05 | 70.78 | 88.1   | 81.77 | -      |
|                  | NCFF excl 2 | 41.65 | 23.89 | 85.04 | 68.65 | 60.37 | 74.16  | 80.32 | -      |
|                  | MLP         | 81.2  | 62.05 | 97.99 | 99.09 | 82.61 | 0      | 99.13 | 81.28  |
| normal testset 4 | SNC         | 5.9   | 4.23  | 61.39 | 47.24 | 27.31 | 67.78  | 55.04 | 17.4   |
|                  | linear      | 13.21 | 8.51  | 65.71 | 57.53 | 36.77 | 99.11  | 46.84 | 24.16  |
|                  | NK1         | -     | -     | 93.74 | -     | 72.98 | -      | -     | 68.61  |
|                  | NK2         | -     | -     | 93.23 | -     | 70.12 | -      | -     | 65.65  |
|                  | NCFF excl 1 | 60.72 | 37.5  | 92.53 | 74    | 67.24 | 88.57  | 56.45 | -      |
|                  | NCFF excl 2 | 43.17 | 25.46 | 92.28 | 60.93 | 63.67 | 61.44  | 56.2  | -      |
|                  | MLP         | 80.62 | 61.44 | 97.49 | 98.91 | 80.69 | 0      | 99.98 | 79.16  |
| NCFF 0-0         | linear      | 16.06 | 8.9   | 71.63 | 30.92 | 6.94  | 97.43  | 51.25 | 4.3    |
|                  | NK1         | -     | -     | 97.34 | -     | 12.21 | -      | -     | 11.38  |
|                  | NK2         | -     | -     | 97.48 | -     | 15.76 | -      | -     | 15.18  |
|                  | mlp         | 65    | 50.01 | 99.57 | 93.45 | 9.92  | 99.95  | 99.92 | 9.71   |
| NCFF 1-4         | linear      | 14.03 | 11.09 | 40.42 | 57.51 | 0.05  | 99.86  | 42.14 | 0      |
|                  | NK1         | -     | -     | 99.61 | -     | 25.21 | -      | -     | 23.16  |
|                  | NK2         | -     | -     | 73.13 | -     | 19.49 | -      | -     | 15.08  |
|                  | mlp         | 46.42 | 34.33 | 93.18 | 98.03 | 29.25 | 0      | 99.99 | 26.63  |
| NCFF 0-5         | linear      | 11.64 | 7.73  | 92.4  | 64.68 | 8.43  | 99.85  | 52.75 | 8.43   |
|                  | NK1         | -     | -     | 67.26 | -     | 3.11  | -      | -     | 1.66   |
|                  | NK2         | -     | -     | 83.91 | -     | 2.95  | -      | -     | 2.7    |
|                  | mlp         | 58.01 | 39.48 | 97.24 | 98.22 | 3.66  | 0      | 99.97 | 2.7    |
| NCFF 1-3         | linear      | 15.18 | 9.77  | 57.91 | 83.34 | 0     | 99.33  | 46.93 | 0      |
|                  | NK1         | -     | -     | 97.52 | -     | 0.92  | -      | -     | 0.91   |
|                  | NK2         | -     | -     | 96.37 | -     | 1.4   | -      | -     | 1.31   |
|                  | mlp         | 79.48 | 60.41 | 99.89 | 99.94 | 0.55  | 0      | 99.99 | 0.55   |
| NCFF 1-1         | linear      | 17.13 | 11.69 | 74.08 | 76.06 | 0     | 98.12  | 46.27 | 0      |
|                  | NK1         | -     | -     | 95.63 | -     | 14.61 | -      | -     | 14.47  |
|                  | NK2         | -     | -     | 85.16 | -     | 17.84 | -      | -     | 16.97  |
|                  | mlp         | 58.1  | 47.78 | 98.25 | 98.8  | 10.18 | 0      | 99.32 | 9.44   |
| NCFF 0-2         | linear      | 16.27 | 11.76 | 67.23 | 80.28 | 0.25  | 99.08  | 48.57 | 0      |
|                  | NK1         | -     | 15    | 93.75 | -     | 1.76  | -      | -     | 1.51   |
|                  | NK2         | -     | -     | 89.98 | -     | 0.45  | -      | -     | 0.33   |
|                  | mlp         | 78.8  | 59.93 | 98.58 | 99.75 | 0.62  | 0      | 99.98 | 0.55   |

Table 16: Full results for LEI on mpi3d

|                  |             | hor   | vert  | size   | obj h  | cam height | bg h   | shape  | NCFF  |
|------------------|-------------|-------|-------|--------|--------|------------|--------|--------|-------|
| normal testset 0 | SNC         | -     | -     | -      | -      | -          | -      | -      | -     |
|                  | linear      | -     | -     | -      | -      | -          | -      | -      | -     |
|                  | NK1         | -     | -     | -      | -      | -          | -      | -      | -     |
|                  | NK2         | -     | -     | -      | -      | -          | -      | -      | -     |
|                  | NCFF excl 1 | -     | -     | -      | -      | -          | -      | -      | -     |
|                  | NCFF excl 2 | -     | -     | -      | -      | -          | -      | -      | -     |
|                  | MLP         | 2.5   | 2.5   | 99.9   | 100    | 96.2       | 100    | 100    | 96.1  |
| normal testset 1 | SNC         | -     | -     | -      | -      | -          | -      | -      | -     |
|                  | linear      | -     | -     | -      | -      | -          | -      | -      | -     |
|                  | NK1         | -     | -     | -      | -      | -          | -      | -      | -     |
|                  | NK2         | -     | -     | -      | -      | -          | -      | -      | -     |
|                  | NCFF excl 1 | -     | -     | -      | -      | -          | -      | -      | -     |
|                  | NCFF excl 2 | -     | -     | -      | -      | -          | -      | -      | -     |
|                  | MLP         | 3.426 | 2.746 | 99.918 | 99.988 | 95.945     | 100    | 100    | 95.88 |
| normal testset 2 | SNC         | -     | -     | -      | -      | -          | -      | -      | -     |
|                  | linear      | -     | -     | -      | -      | -          | -      | -      | -     |
|                  | NK1         | -     | -     | -      | -      | -          | -      | -      | -     |
|                  | NK2         | -     | -     | -      | -      | -          | -      | -      | -     |
|                  | NCFF excl 1 | -     | -     | -      | -      | -          | -      | -      | -     |
|                  | NCFF excl 2 | -     | -     | -      | -      | -          | -      | -      | -     |
|                  | MLP         | 2.477 | 3.001 | 99.918 | 99.994 | 96.434     | 100    | 100    | 96.37 |
| normal testset 3 | SNC         | -     | -     | -      | -      | -          | -      | -      | -     |
|                  | linear      | -     | -     | -      | -      | -          | -      | -      | -     |
|                  | NK1         | -     | -     | -      | -      | -          | -      | -      | -     |
|                  | NK2         | -     | -     | -      | -      | -          | -      | -      | -     |
|                  | NCFF excl 1 | -     | -     | -      | -      | -          | -      | -      | -     |
|                  | NCFF excl 2 | -     | -     | -      | -      | -          | -      | -      | -     |
|                  | MLP         | 2.702 | 2.336 | 99.935 | 99.988 | 95.555     | 100    | 100    | 95.51 |
| normal testset 4 | SNC         | -     | -     | -      | -      | -          | -      | -      | -     |
|                  | linear      | -     | -     | -      | -      | -          | -      | -      | -     |
|                  | NK1         | -     | -     | -      | -      | -          | -      | -      | -     |
|                  | NK2         | -     | -     | -      | -      | -          | -      | -      | -     |
|                  | NCFF excl 1 | -     | -     | -      | -      | -          | -      | -      | -     |
|                  | NCFF excl 2 | -     | -     | -      | -      | -          | -      | -      | -     |
|                  | MLP         | 2.65  | 2.457 | 99.748 | 99.988 | 95.09      | 100    | 100    | 94.87 |
| NCFF 0-0         | linear      | -     | -     | -      | -      | -          | -      | -      | -     |
|                  | NK1         | -     | -     | -      | -      | -          | -      | -      | -     |
|                  | NK2         | -     | -     | -      | -      | -          | -      | -      | -     |
|                  | mlp         | 2.2   | 2.3   | 50.5   | 21.7   | 8.5        | 43.9   | 58.6   | 2.67  |
| NCFF 1-4         | linear      | -     | -     | -      | -      | -          | -      | -      | -     |
|                  | NK1         | -     | -     | -      | -      | -          | -      | -      | -     |
|                  | NK2         | -     | -     | -      | -      | -          | -      | -      | -     |
|                  | mlp         | 2.5   | 0     | 96.6   | 53.9   | 11.6       | 99.6   | 100    | 11.4  |
| NCFF 0-5         | linear      | -     | -     | -      | -      | -          | -      | -      | -     |
|                  | NK1         | -     | -     | -      | -      | -          | -      | -      | -     |
|                  | NK2         | -     | -     | -      | -      | -          | -      | -      | -     |
|                  | mlp         | 1.786 | 2.444 | 49.549 | 20.931 | 7.951      | 42.794 | 58.668 | 7.36  |
| NCFF 1-3         | linear      | -     | -     | -      | -      | -          | -      | -      | -     |
|                  | NK1         | -     | -     | -      | -      | -          | -      | -      | -     |
|                  | NK2         | -     | -     | -      | -      | -          | -      | -      | -     |
|                  | mlp         | 2.316 | 2.516 | 51.524 | 19.622 | 9.767      | 42.052 | 57.677 | 3.06  |
| NCFF 1-1         | linear      | -     | -     | -      | -      | -          | -      | -      | -     |
|                  | NK1         | -     | -     | -      | -      | -          | -      | -      | -     |
|                  | NK2         | -     | -     | -      | -      | -          | -      | -      | -     |
|                  | mlp         | 2.9   | 3.75  | 51.196 | 31.381 | 54.807     | 100    | 100    | 2.9   |
| NCFF 0-2         | linear      | -     | -     | -      | -      | -          | -      | -      | -     |
|                  | NK1         | -     | 16    | -      | -      | -          | -      | -      | -     |
|                  | NK2         | -     | -     | -      | -      | -          | -      | -      | -     |
|                  | mlp         | 2.389 | 2.519 | 59.978 | 21.817 | 6.456      | 45.272 | 58.735 | 2.68  |



| Table 17: Full results for PVAE on mpi3d |             |       |       |       |       |            |       |       |
|------------------------------------------|-------------|-------|-------|-------|-------|------------|-------|-------|
|                                          |             | hor   | vert  | size  | obj h | cam height | bg h  | shape |
| normal testset 0                         | SNC         | 10.31 | 6.69  | 59.61 | 20.7  | 85.2       | 79.62 | 21.03 |
|                                          | linear      | 13.61 | 5.03  | 74.11 | 30.09 | 100        | 99.84 | 28.68 |
|                                          | NK1         | 35.76 | 26.67 | 81.59 | 81.86 | 96.79      | 0     | 25.76 |
|                                          | NK2         | 21.55 | 16.02 | 72.49 | 79.75 | 91.13      | 46.91 | 23.22 |
|                                          | NCFF excl 1 | 25.58 | 13.43 | 77.83 | 88.29 | 100        | 97.47 | 40.07 |
|                                          | NCFF excl 2 | 24.24 | 11.76 | 75.65 | 83.22 | 98.03      | 79.15 | -     |
|                                          | MLP         | 38.36 | 26.28 | 81.37 | 93.46 | 100        | 99.97 | 37.5  |
| normal testset 1                         | SNC         | 9.2   | 6.89  | 59.86 | 23.5  | 99.46      | 89.06 | 20.94 |
|                                          | linear      | 13.81 | 4.39  | 72.6  | 30.92 | 100        | 98.54 | 28.38 |
|                                          | NK1         | 35.22 | 25.92 | 83.1  | 84.98 | 98.33      | 0     | 25.41 |
|                                          | NK2         | -     | -     | -     | -     | -          | -     | -     |
|                                          | NCFF excl 1 | 22.6  | 10.79 | 79.67 | 85.59 | 100        | 97.58 | 39.44 |
|                                          | NCFF excl 2 | 21.1  | 8.91  | 78.62 | 79.52 | 98.33      | 82.01 | -     |
|                                          | MLP         | 35.75 | 23.08 | 81.95 | 88.11 | 100        | 99.87 | 35.97 |
| normal testset 2                         | SNC         | 7.47  | 4.07  | 69.29 | 20.73 | 95.12      | 89.54 | 21.84 |
|                                          | linear      | 12.42 | 4.52  | 75.2  | 32.37 | 100        | 98.98 | 28.73 |
|                                          | NK1         | 30.6  | 22.44 | 80.46 | 78.33 | 94.38      | 99.98 | 24.45 |
|                                          | NK2         | -     | -     | -     | -     | -          | -     | -     |
|                                          | NCFF excl 1 | 21.08 | 13.06 | 76.98 | 81.63 | 100        | 91.97 | 37.33 |
|                                          | NCFF excl 2 | 18.89 | 11.11 | 75.78 | 80.24 | 99.02      | 79.49 | -     |
|                                          | MLP         | 32.55 | 21.78 | 79.78 | 84.59 | 100        | 99.8  | 34.82 |
| normal testset 3                         | SNC         | 8.26  | 5.38  | 66.09 | 23.87 | 99.91      | 99.97 | 21.07 |
|                                          | linear      | 11.58 | 5.26  | 73.16 | 34.27 | 100        | 99.4  | 27.87 |
|                                          | NK1         | 32.36 | 23.57 | 81.11 | 81.84 | 97.11      | 100   | 24.55 |
|                                          | NK2         | -     | -     | -     | -     | -          | -     | -     |
|                                          | NCFF excl 1 | 23.88 | 11.58 | 78.3  | 82.85 | 100        | 85.69 | 37.52 |
|                                          | NCFF excl 2 | 18.98 | 10.62 | 77.25 | 81.59 | 99.17      | 61.82 | -     |
|                                          | MLP         | 29.91 | 21    | 80.05 | 86    | 100        | 99.99 | 33.08 |
| normal testset 4                         | SNC         | 7.21  | 4.49  | 72.89 | 21.37 | 99.93      | 66.75 | 24.29 |
|                                          | linear      | 12.72 | 5.04  | 74.3  | 32.78 | 100        | 70.82 | 29.77 |
|                                          | NK1         | 33.66 | 25    | 81.62 | 86.48 | 97.44      | 84.37 | 26.23 |
|                                          | NK2         | -     | -     | -     | -     | -          | -     | -     |
|                                          | NCFF excl 1 | 19.12 | 11.63 | 80.55 | 90.2  | 100        | 77.85 | 36.97 |
|                                          | NCFF excl 2 | 18.01 | 9.97  | 77.48 | 90.18 | 98.97      | 75.15 | -     |
|                                          | MLP         | 32.78 | 24.02 | 80.31 | 91.45 | 100        | 84.24 | 34.44 |
| NCFF 0-0                                 | linear      | 9.29  | 2.77  | 93.64 | 23.7  | 100        | 92.7  | 0     |
|                                          | NK1         | 22.4  | 18.86 | 94.57 | 59.36 | 98.51      | 98.15 | 0     |
|                                          | NK2         | 20.5  | 17.94 | 89.99 | 41.76 | 75.88      | 0     | 0     |
|                                          | mlp         | 21.86 | 18.07 | 98.32 | 70.95 | 100        | 99.57 | 0.06  |
| NCFF 1-4                                 | linear      | 12.39 | 5.12  | 60.38 | 38.19 | 100        | 97.27 | 0     |
|                                          | NK1         | 27.4  | 20.65 | 74.17 | 85.05 | 98.18      | 99.58 | 0     |
|                                          | NK2         | -     | -     | -     | -     | -          | -     | -     |
|                                          | mlp         | 27.8  | 18.19 | 80.16 | 85.51 | 100        | 99.52 | 0.08  |
|                                          | -           | -     | -     | -     | -     | -          | -     | -     |
| NCFF 0-5                                 | linear      | 10.58 | 4.2   | 88.16 | 31.08 | 100        | 99.21 | 0     |
|                                          | NK1         | 29.66 | 26.42 | 92.56 | 87.57 | 96.71      | 0     | 0     |
|                                          | NK2         | 20.04 | 16.86 | 89.64 | 53.77 | 94.58      | 76.37 | 0     |
|                                          | mlp         | 28.58 | 24.29 | 92.93 | 90.35 | 100        | 99.99 | 0.05  |
| NCFF 1-3                                 | linear      | 10.65 | 4.67  | 90.47 | 31.14 | 100        | 96.15 | 0     |
|                                          | NK1         | 25.45 | 17.84 | 95.56 | 81.02 | 94.3       | 98.87 | 0     |
|                                          | NK2         | 23.91 | 15.93 | 93    | 72.66 | 86.86      | 94.24 | 0     |
|                                          | mlp         | 28.4  | 17.32 | 97.09 | 86.12 | 100        | 98.58 | 0.95  |
| NCFF 1-1                                 | linear      | 11.27 | 4.79  | 84.14 | 31.4  | 100        | 98.36 | 0     |
|                                          | NK1         | 30.6  | 19.26 | 95.66 | 82.08 | 96.33      | 0     | 0     |
|                                          | NK2         | 19.99 | 11.86 | 97.83 | 56.9  | 82.33      | 98.11 | 0     |
|                                          | mlp         | 31.14 | 18.25 | 92.75 | 88.23 | 100        | 99.66 | 0.02  |
| NCFF 0-2                                 | linear      | 12.43 | 4.9   | 59.53 | 37.04 | 100        | 97.06 | 0     |
|                                          | NK1         | 28    | 20.49 | 74.03 | 84.77 | 98.28      | 99.58 | 0     |
|                                          | NK2         | -     | -     | -     | -     | -          | -     | -     |
|                                          | mlp         | 29.03 | 18.11 | 79.58 | 86.12 | 100        | 99.48 | 0.05  |
